# Supplementary material for: Identification of diagnostic biomarkers and therapeutic targets for abdominal aortic aneurysm via transcriptome sequencing and integrated bioinformatics
Source: Research Square preprint supplement (doi:10.21203/rs.3.rs-7886883/v1), 2025-12-02
Supplement: Supplementary file 1 [file 71d9ea8e3f427c8572f38d0a.docx]

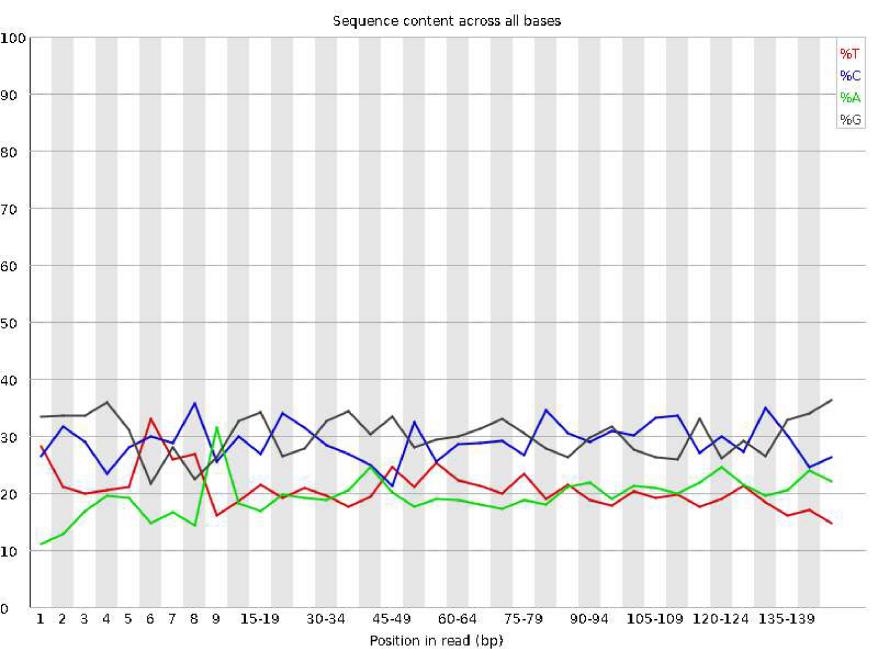


Supplementary Figure 1. Quality control of raw sequencing data using FastQC (v0.11.5) and base error rate estimation with Phred. Clean reads were obtained and aligned to the reference genome using HISAT2.


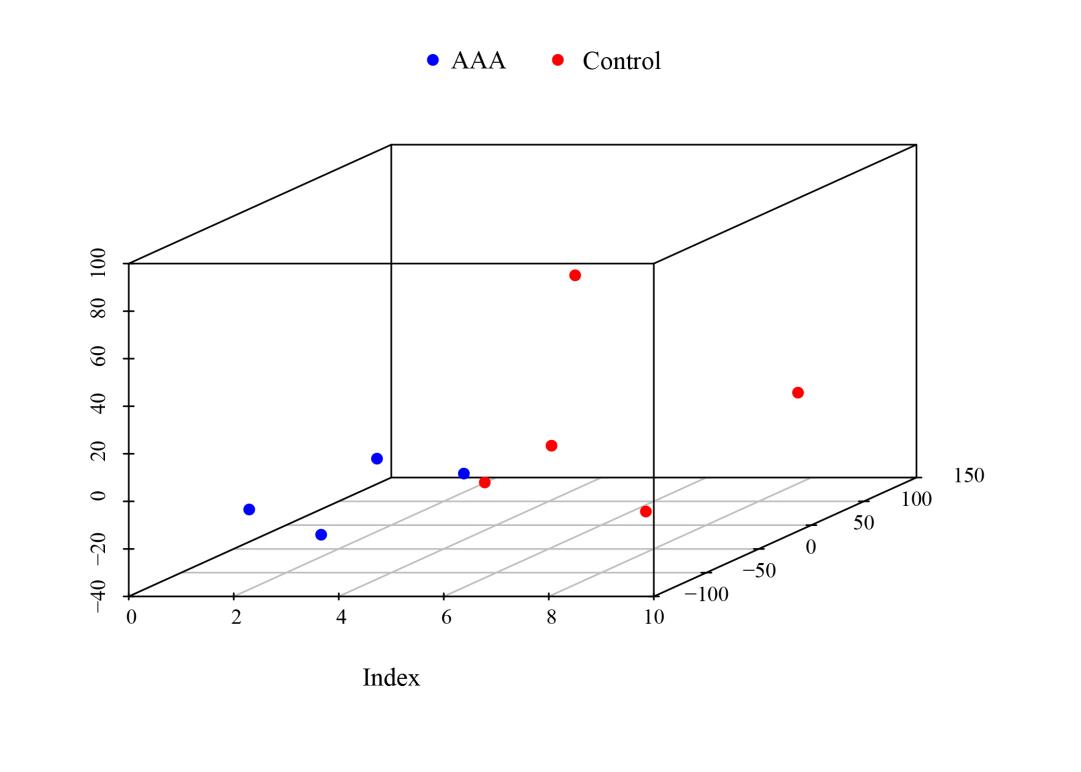


Supplementary Figure 2. Principal component analysis (PCA) performed using the scatterplot3d (v0.3-44) package to assess sample dispersion and intra-group repeatability.


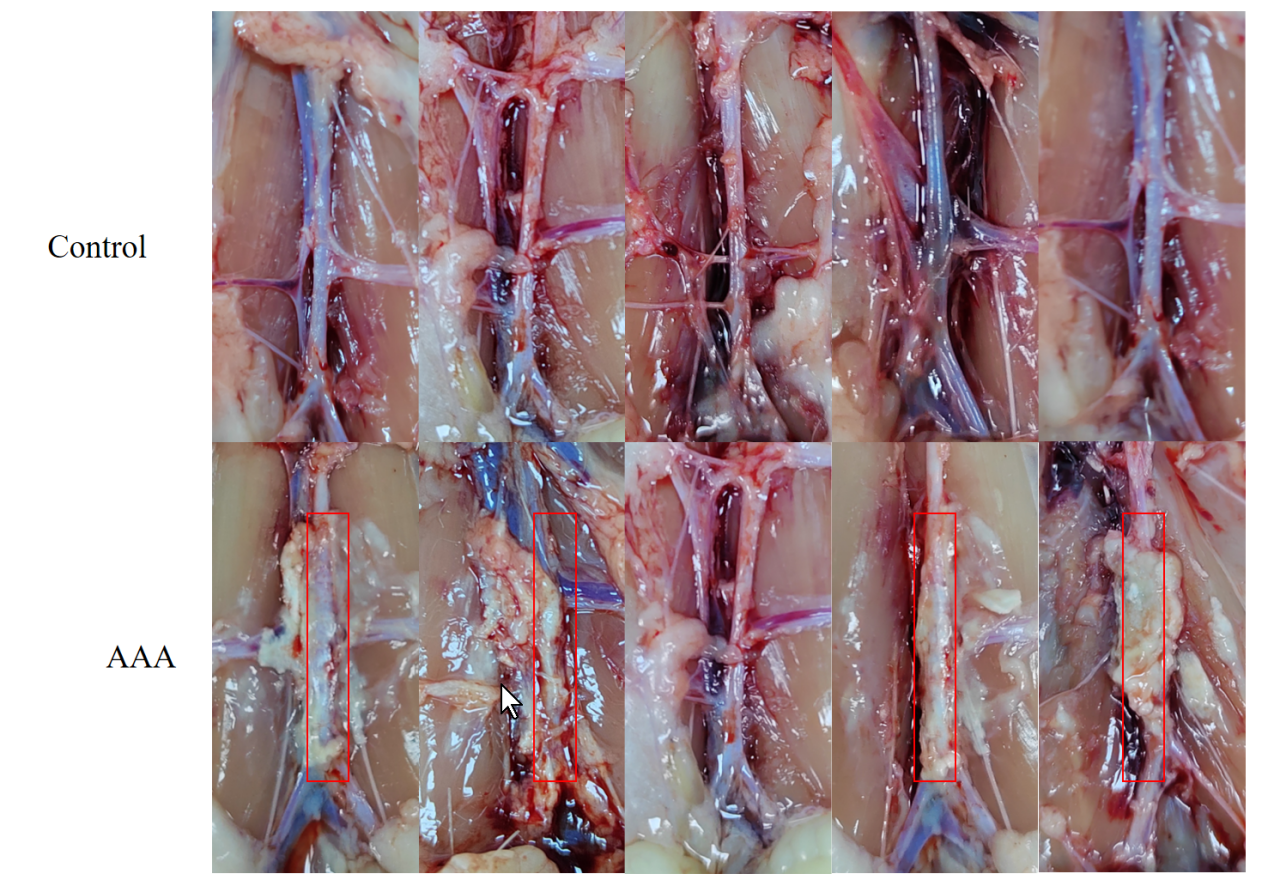


Supplementary Figure 3. Representative images from animal experiments.

Macroscopic photographs of abdominal aortic aneurysm (AAA) tissues in the rat model compared with normal control aortas. Obvious dilation of the abdominal aorta is visible in the AAA group.

RNA concentration detection results：

| NO. | Sample | Group | Concentration  (ng/uL) | A260/A280 | A260/A230 |
| --- | --- | --- | --- | --- | --- |
| 1 | A1 | Control | 108.52 | 1.478 | 0.304 |
| 2 | A2 | Control | 336.88 | 1.86 | 0.917 |
| 3 | A3 | Control | 696.96 | 1.861 | 1.224 |
| 4 | A4 | Control | 55.4 | 1.527 | 0.27 |
| 5 | A5 | Control | 80.24 | 1.231 | 0.176 |
| 6 | B1 | AAA | 459.48 | 1.81 | 0.746 |
| 7 | B2 | AAA | 724.8 | 1.835 | 1.174 |
| 8 | B3 | AAA | 1825 | 1.97 | 1.606 |
| 9 | B4 | AAA | 2790.2 | 1.989 | 1.679 |
| 10 | B5 | AAA | 669.44 | 1.927 | 1.143 |

Fcgr2b：


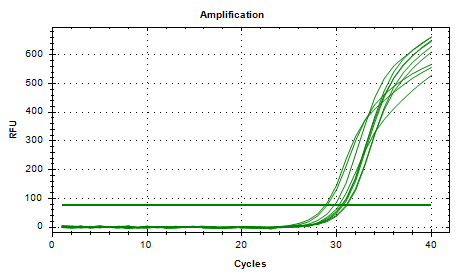

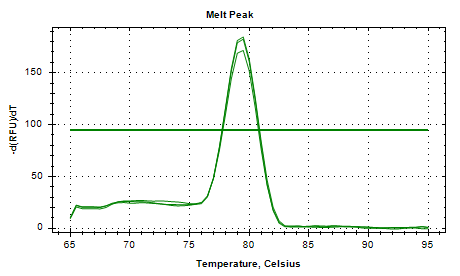


Tlr7：


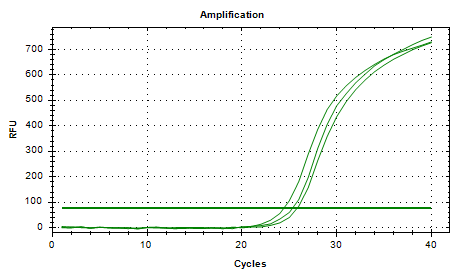

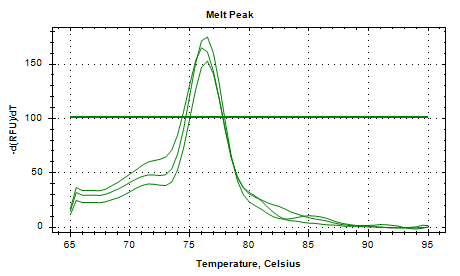


Clec7a：


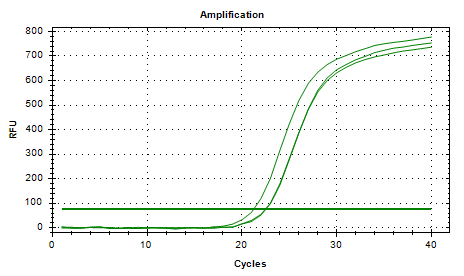

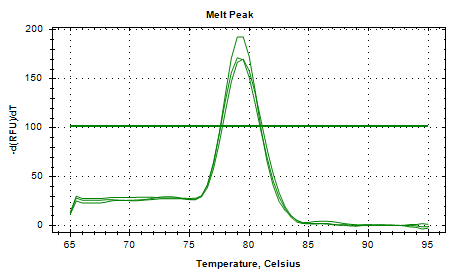


Tlr9：


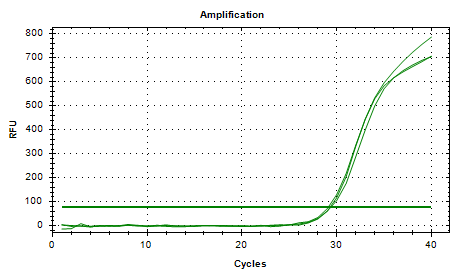

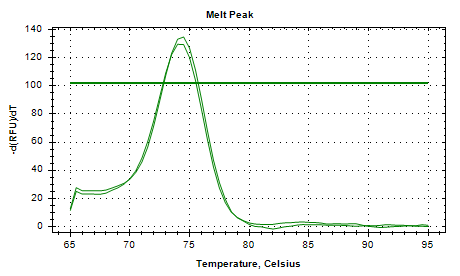


Cd53：


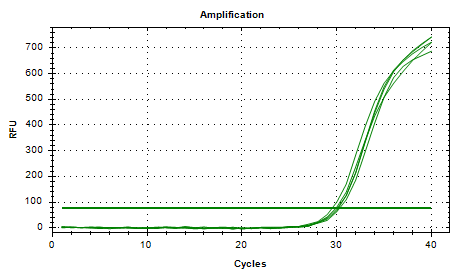

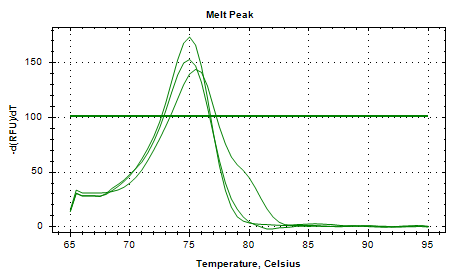


GAPDH：


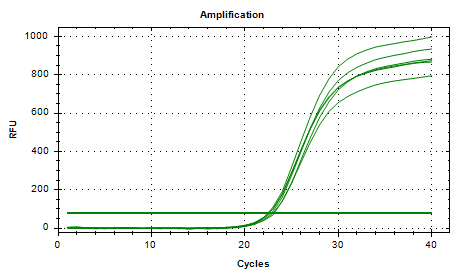

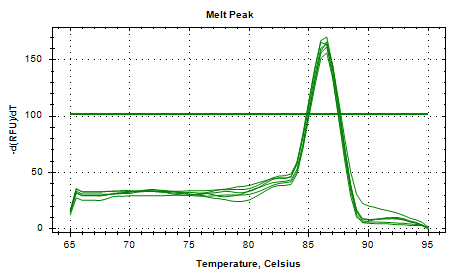


Supplementary Figure 4. Primer validation for RT-qPCR analysis.

Supplementary Table 1. Primer sequences for six genes used for RT-qPCR validation.

| Primers | Sequences | |
| --- | --- | --- |
| Fcgr2b F | GGAATCCTGCCGTTCCTACTG | |
| Fcgr2b R | ATGGCACAAAGTCCGTGAGAA | |
| Tlr7 F | TCTTTGGGTTTCGATGGTTTCC |
| Tlr7 R | GCAGTCCACGATCACATGGG |
| Clec7a F | AAAGCCAAACATCGTCTCACC |
| Clec7a R | CGAGTTGGGGAAGAATGCTGAT |
| Tlr9 F | ATGGTTCTCCGTCGAAGGACT |
| Tlr9 R | GAGGCTTCAGCTCACAGGG |
| Cd53 F | GCCTGCTTATGTCGTTCTTTGT |
| Cd53 R | CCTCAGCCACTAAAGTGTTGAGT |
| GAPDH F | GGCCGGAGACGAATGGAAATTA |
| GAPDH R | CCAAATCCGTTCACACCGAC |

Supplementary Table 2. Summary of alignment comparison rates (70%–90%) for 4 AAA and 5 control samples selected for downstream analysis after Cufflinks processing.

| Sample | Valid reads | Mapped reads |
| --- | --- | --- |
| A1 | 2180 | 932(42.75%) |
| A2 | 79623356 | 63782730(80.11%) |
| A3 | 86053768 | 80024237(92.99%) |
| A4 | 105530 | 88695(84.05%) |
| A5 | 84564292 | 79920380(94.51%) |
| B1 | 34374464 | 32032287(93.19%) |
| B2 | 80440246 | 75957429(94.43%) |
| B3 | 393262 | 357593(90.93%) |
| B4 | 82972418 | 77429589(93.32%) |
| B5 | 74677390 | 72203623(96.69%) |
