# Supplementary material for: Identification of diagnostic biomarkers and therapeutic targets for abdominal aortic aneurysm via transcriptome sequencing and integrated bioinformatics
Source: Research Square preprint supplement (doi:10.21203/rs.3.rs-7886883/v1), 2025-12-02
Supplement: Supplementary file 2 [file faeb13f228190d2dd7339d56.xlsx]

## Sheet: 01.mRNA_count
gene_name	A2	A3	A4	A5	B1	B2	B3	B4	B5
Mt-nd1	5213	390544	489	494430	57110	113824	627	354451	6653
Mt-nd2	4291	381330	774	700708	53875	162530	915	517050	8921
Mt-co1	46337	1703278	2287	2120736	245408	406030	2678	1612561	20054
Mt-co2	13266	545062	676	677390	57499	200841	1293	696835	10508
Mt-atp8	6796	822287	1332	1083157	126769	329730	1521	987021	17924
Mt-atp6	4315	216891	239	347502	18224	59284	167	273660	4761
Mt-co3	7837	600586	930	847944	92073	197049	1297	652076	7212
Mt-nd3	1188	70391	64	75775	8195	19878	84	66044	967
Mt-nd4l	12300	421339	587	535518	69459	122924	724	515499	8070
Mt-nd4	4	6	6	6	5	6	4	4	8
Mt-nd5	23383	579694	819	777208	78514	163759	1069	679881	10158
Mt-nd6	11	939	0	96	1	1	0	233	0
Mt-cyb	11077	692739	999	945072	115717	163361	990	693740	7760
Zfp300	0	68	0	55	13	20	0	211	11
Spaca5	0	6	0	3	2	3	0	32	0
Zfp182	0	69	0	90	9	98	0	299	13
LOC100363372	0	96	0	90	20	81	0	313	24
Uxt	2	1	0	7	0	57	0	97	0
Elk1	0	91	0	156	16	145	0	29	0
Cfp	23	185	0	222	25	166	0	457	35
Syn1	36	24	0	8	60	14	0	75	0
LOC102555453	204	802	0	308	231	375	11	1274	83
Timp1	0	0	0	64	0	742	0	88	90
Araf	157	471	0	540	71	249	0	1268	30
AABR07036746.1	103	242	0	155	91	81	0	425	21
AC120727.1	99	254	0	155	89	82	0	430	20
Usp11	0	204	0	96	38	96	0	349	10
Cdk16	10	38	0	223	7	5	0	412	7
Cdk16	0	0	0	1	0	1	0	1	0
Uba1	374	1681	0	1366	341	1172	6	6335	219
Rbm10	107	416	0	113	76	210	4	245	29
Rbm10	0	188	0	701	6	46	0	1316	0
Ndufb11	116	612	0	915	89	163	0	3451	29
Rgn	0	35	0	55	0	3	0	323	0
RGD1564855	0	19	0	12	3	4	0	35	0
Jade3	0	34	0	55	0	36	0	209	0
Rp2	2	37	0	36	9	168	0	134	15
Rp2	0	0	0	0	0	1	0	0	0
Slc9a7	14	22	0	35	16	164	0	98	12
Chst7	22	90	0	77	11	8	0	183	0
AABR07036855.1	6	135	0	115	44	97	0	691	15
Dipk2b	0	75	0	107	0	5	0	130	0
Kdm6a	0	54	0	163	0	54	0	767	0
Fundc1	4	85	0	56	16	85	0	309	5
Efhc2	0	21	0	8	0	0	0	29	0
LOC100909913	0	3	0	0	2	0	0	0	0
Maob	0	116	0	42	15	27	0	425	0
Maoa	8	372	0	250	181	314	0	1274	36
Ndp	0	10	0	0	4	5	0	10	0
AABR07037009.1	27	22	0	19	19	59	0	78	7
Cask	0	18	0	22	37	0	3	21	31
Cask	0	4	0	7	0	19	0	4	0
Gpr82	0	5	0	5	2	14	0	17	3
Gpr34	0	15	0	10	5	144	0	40	8
Cask	38	56	0	18	3	121	0	187	1
Nyx	0	7	0	0	9	0	0	0	3
Ddx3x	237	2136	0	1775	359	2481	13	8141	343
Ddx3x	19	628	0	688	91	499	0	1516	93
Rpl21	33	806	0	302	164	304	3	1300	56
Usp9x	9	12	0	909	6	144	0	153	6
Ube2q2l	2	23	0	8	7	39	4	30	8
Med14	21	0	0	248	33	229	0	0	31
Med14	56	368	0	680	22	378	0	1686	61
Med14	0	13	0	3	0	4	0	25	0
RGD1565685	0	0	0	0	0	7	0	264	0
RGD1565685	0	63	0	38	32	28	0	0	0
Atp6ap2	4	127	0	109	102	1156	0	555	197
Bcor	69	463	0	439	59	378	0	1040	45
Mid1ip1	273	652	0	256	126	164	0	1312	27
AABR07037112.1	0	2	0	3	0	0	0	4	0
Tspan7	107	511	0	354	102	0	0	227	0
Hypm	0	4	0	0	0	0	0	95	0
LOC100363125	3	4	0	5	0	0	0	118	0
Sytl5	0	140	0	130	0	2	0	473	0
Srpx	0	396	0	216	51	0	0	793	125
Rpgr	0	56	0	68	5	30	0	210	10
Lancl3	0	0	0	0	4	8	0	0	4
Xk	0	2	0	10	0	0	0	17	0
Xk	0	16	0	7	16	9	0	53	0
Cybb	17	190	3	82	106	13977	34	667	1225
Dynlt3	35	628	0	384	151	416	0	4224	47
B630019K06Rik	0	2	0	11	3	0	0	3	0
LOC102552805	0	2	0	0	0	0	0	6	0
AABR07037173.1	0	2	0	5	0	5	0	39	0
Slc38a5	0	5	0	0	0	0	0	0	0
Ftsj1	0	170	0	172	17	97	0	620	22
Porcn	49	78	0	40	18	36	0	176	0
Ebp	0	85	0	31	16	78	0	315	23
Tbc1d25	63	126	0	130	23	80	4	287	7
Rbm3	0	370	0	219	38	363	8	227	86
Rbm3	0	211	0	332	51	126	0	747	25
Wdr13	0	4	0	22	6	1	0	9	0
Wdr13	0	0	0	5	0	1	0	4	0
Was	42	49	0	28	0	233	0	72	24
Suv39h1l1	16	84	0	63	11	125	0	273	9
Gata1	0	5	0	0	0	5	0	0	0
Hdac6	69	208	0	232	12	63	0	696	10
LOC108348138	0	0	0	0	0	0	0	6	0
Pcsk1n	95	178	0	35	211	21	0	75	0
Timm17b	0	68	0	64	7	28	0	191	6
Pqbp1	0	21	0	0	0	0	0	22	11
LOC108348091	0	5	0	0	0	5	0	0	0
LOC108348065	0	2	0	7	0	0	0	1	0
Eras	0	0	0	0	0	0	0	7	0
LOC108348172	103	200	0	43	229	22	0	82	0
LOC100911130	4	77	0	67	7	27	0	84	3
Pqbp1	0	13	0	34	0	59	0	53	0
Slc35a2	24	93	0	104	15	63	0	289	10
Pim2	11	16	0	7	13	15	0	45	0
Otud5	0	229	0	155	97	99	0	177	0
Kcnd1	15	35	0	20	8	45	0	78	5
Gripap1	2	796	0	472	8	380	0	307	0
Tfe3	171	273	0	220	22	225	3	637	22
Ccdc120	56	57	0	58	9	29	0	123	0
Praf2	19	0	0	0	2	1	0	4	0
Wdr45	80	237	0	183	0	116	0	480	34
Gpkow	47	378	0	458	53	205	7	1276	31
Magix	4	14	0	6	3	4	0	35	0
Plp2	36	252	0	114	63	882	0	539	64
Prickle3	47	253	0	259	11	40	0	287	2
Syp	81	0	0	3	197	18	0	22	0
Cacna1f	0	7	0	11	0	0	0	51	0
Ccdc22	43	247	0	310	15	150	0	509	25
Foxp3	0	0	0	19	0	25	0	65	0
Foxp3	0	0	0	0	0	6	0	0	0
Usp27x	2	41	0	18	5	14	0	42	0
Clcn5	18	57	0	98	16	112	0	338	16
Clcn5	0	6	0	8	0	5	0	8	9
Ccnb3	0	0	0	0	0	0	0	6	0
Shroom4	72	10	0	5	58	86	0	162	12
AABR07037243.1	2	5	0	5	4	0	0	17	2
Bmp15	0	0	0	0	0	0	0	11	4
Nudt10	0	22	0	22	14	0	0	96	0
Smptb	2	6	0	48	0	0	0	19	0
Nudt11	1	14	0	20	4	0	0	46	0
LOC302576	0	0	0	0	0	0	0	3	0
Mycs	0	0	0	3	0	0	0	0	0
Spin2a	0	7	0	2	0	0	0	3	0
LOC100909485	0	1	0	0	0	0	0	2	0
LOC681355	5	263	0	18	39	16	2	45	31
Ubqln2	114	385	0	209	114	218	0	887	50
Klf8	0	9	0	6	0	6	0	27	0
AABR07037343.1	12	43	0	25	9	3	0	74	3
LOC108348096	0	20	0	7	10	17	0	30	0
Mageh1	16	79	0	40	26	15	0	215	4
RragB	0	25	0	6	10	14	0	28	0
AABR07037395.2	0	1	0	2	1	2	0	7	1
Gnl3l	58	645	0	384	162	386	0	1539	77
Tsr2	6	0	0	0	0	0	0	0	0
Fgd1	0	75	0	36	15	29	0	144	6
Tsr2	15	231	0	106	67	83	0	401	14
Wnk3	0	8	0	0	0	16	0	36	0
AABR07037412.1	0	2	0	0	0	2	0	4	0
AABR07037451.2	107	348	0	164	63	66	2	1026	12
AABR07037451.2	0	2	0	1	0	0	0	3	0
Fam156b	0	10	0	10	3	0	0	22	0
AABR07037447.1	0	0	0	3	3	1	0	3	0
Phf8	111	455	2	649	34	313	0	1973	36
Huwe1	0	4	0	15	0	32	0	76	0
Huwe1	966	2474	0	2288	361	1380	16	7464	345
Hsd17b10	140	402	0	257	55	122	0	2359	12
Ribc1	0	65	0	62	7	24	0	255	8
Ribc1	0	0	0	2	0	0	0	5	0
Smc1a	131	1084	0	1165	58	850	0	4700	202
Iqsec2	17	1	0	3	0	0	0	8	0
Iqsec2	1	10	0	1	1	6	0	15	3
Kdm5c	0	0	0	112	0	0	0	0	4
Kdm5c	0	442	0	473	37	267	0	1348	0
Kdm5c	0	258	0	517	0	183	0	1425	0
Tspyl2	0	0	0	187	32	0	0	343	27
Tspyl2	19	225	0	93	36	166	0	382	14
AABR07037520.1	9	7	0	0	44	0	0	41	0
Pfkfb1	37	227	4	409	4	0	0	746	0
Pfkfb1	0	203	0	334	0	0	0	377	0
Pfkfb1	0	0	0	0	0	0	0	15	0
Apex2	16	87	0	96	6	65	0	273	8
Alas2	0	99	0	39	45	12	0	137	20
AABR07037536.1	13	79	0	94	26	63	0	288	28
LOC685699	0	0	0	0	0	0	0	4	0
Shroom2	17	86	0	70	75	30	0	339	14
Shroom2	0	0	0	0	0	0	0	8	0
Wwc3	0	7	0	4	143	0	0	12	40
Clcn4	57	179	0	131	32	179	0	1576	12
Mid1	0	257	0	150	102	126	0	390	50
Mid1	0	13	0	6	0	0	0	2	0
4933400A11Rik	0	0	0	0	0	3	0	0	0
Hccs	38	205	0	157	40	96	5	1082	11
Arhgap6	0	108	0	42	17	238	0	130	21
Amelx	0	2	0	0	0	5	0	6	0
Amelx	0	0	0	0	0	14	0	0	0
Msl3	0	358	0	160	70	93	0	470	17
Frmpd4	13	9	0	0	67	0	0	30	0
Prps2	0	379	0	102	44	174	0	334	19
Tlr7	0	45	0	18	16	612	0	129	118
Tlr8	0	36	0	19	17	1170	6	218	165
Tmsb4x	252	7510	9	4576	2229	17892	134	13530	1499
LOC100910245	0	7	0	3	4	14	0	29	0
Egfl6	0	2	0	0	0	0	0	0	0
Tceanc	0	12	0	2	0	3	0	41	0
Saxol1	6	0	0	3	0	2	0	5	0
Rab9a	10	121	0	75	34	151	0	596	32
Trappc2	0	49	0	17	10	53	0	114	8
Ofd1	0	89	0	124	14	159	0	449	35
Gpm6b	0	14	0	11	0	0	0	175	0
Gpm6b	0	4	0	0	19	3	0	11	0
Gemin8	0	45	0	40	11	48	0	136	0
Fancb	0	24	0	0	0	10	0	85	0
Mospd2	18	87	0	95	6	65	0	273	0
Mospd2	0	105	0	46	0	56	0	219	0
Piga	0	30	0	45	0	35	0	177	0
Vegfd	0	73	0	18	11	96	0	345	28
Pir	0	127	0	58	28	43	0	415	0
Bmx	0	40	0	22	32	0	0	50	0
Ace2	0	27	0	34	0	0	0	197	0
Ca5b	30	551	0	332	62	237	0	8842	18
Zrsr2	0	119	4	148	30	78	0	356	17
Ap1s2	0	0	0	3	0	243	0	31	80
Ap1s2	0	83	0	74	88	331	0	220	0
RGD1565844	0	0	0	0	0	6	0	0	0
Ctps2	1	0	0	0	0	0	0	0	0
S100g	0	3	0	0	0	0	0	15	0
Syap1	19	378	0	391	56	200	0	2269	50
Txlng	0	253	0	396	0	15	0	398	31
Rbbp7	40	712	0	464	114	614	5	2217	105
LOC103692785	4	4	0	2	6	5	0	12	1
Reps2	0	12	0	0	7	191	0	39	31
Reps2	0	21	0	0	3	88	0	0	7
RGD1560203	0	0	0	0	0	2	0	0	0
Nhs	0	0	0	32	0	0	0	67	0
Nhs	0	103	0	40	16	58	0	72	15
Rai2	9	143	0	89	31	0	0	177	0
Scml2	0	26	0	17	8	58	0	47	0
Cdkl5	0	84	0	62	0	27	0	222	0
Cdkl5	31	14	0	0	12	7	0	25	0
AABR07037995.1	0	27	0	28	0	58	0	79	0
Adgrg2	0	9	0	8	6	34	0	103	0
AABR07037998.1	5	3	0	3	3	4	0	12	0
Pdha1	0	248	0	0	0	0	0	208	0
Pdha1	0	0	0	0	0	0	0	5	0
AABR07038021.1	0	0	0	19	0	0	0	76	0
Rps6ka3	0	371	0	204	0	1311	0	1351	198
Eif1ax	105	609	0	394	131	550	0	1981	88
AABR07038029.1	0	0	0	9	0	0	0	10	0
Sh3kbp1	367	7	0	27	140	1	0	288	107
Sh3kbp1	0	70	0	90	0	20	0	49	0
Sh3kbp1	0	1	0	0	0	1	0	9	0
Bclaf3	0	114	0	106	27	91	0	297	18
Map7d2	0	73	0	38	92	34	0	120	0
Cnksr2	26	28	0	15	24	5	0	128	8
Cnksr2	0	13	0	8	18	7	0	59	0
Klhl34	4	14	0	0	20	4	0	31	0
Mbtps2	5	57	0	53	0	186	0	349	27
Mbtps2	0	21	0	8	4	28	0	25	0
Sms	11	69	0	64	38	61	0	238	12
Phex	0	53	0	26	0	0	0	40	2
LOC100361934	19	57	0	50	26	50	3	182	33
Ptchd1	0	5	0	0	14	7	0	27	0
Prdx4	19	239	0	86	51	186	0	404	23
LOC102557137	0	0	0	10	0	0	0	15	0
Acot9	0	221	0	182	81	221	0	777	30
Sat1	0	112	0	438	113	275	0	208	75
AABR07038250.1	0	0	0	0	0	0	0	3	0
LOC317456	0	40	0	10	0	48	0	130	0
Tbl1x	126	1011	0	605	177	727	10	3614	122
Prkx	22	315	0	519	60	597	7	1087	58
Ptges3l1	0	33	0	39	15	51	0	73	6
Sts	160	328	0	356	22	177	0	879	32
Pnpla4	0	67	0	91	8	12	0	160	0
RGD1563378	0	0	0	0	0	0	0	6	0
Prrg1	24	65	0	74	9	13	0	566	39
AABR07038349.1	0	0	0	0	0	0	0	20	0
Tmem47	23	300	0	245	68	330	0	814	54
Dmd	74	544	2	259	260	81	0	998	22
LOC102549011	0	0	0	2	0	0	0	5	0
Dmd	0	4	0	0	15	0	0	22	0
AC127605.1	0	0	0	0	0	0	0	9	0
AC127605.1	0	3	0	0	0	0	0	0	0
Dmd	0	0	0	3	0	0	0	0	0
Dmd	5	8	0	1	3	0	0	336	0
Tab3	18	78	0	59	18	77	0	317	10
Gk	0	44	0	1054	0	15	0	171	0
Gk	0	19	0	7	0	14	0	147	0
Gk	0	0	0	0	0	0	0	1	0
LOC100363193	0	12	0	20	2	0	0	153	0
RGD1565785	0	0	0	0	0	103	0	17	17
Pola1	15	135	0	117	10	215	0	555	36
Pola1	1	63	0	0	5	5	0	7	33
Pola1	0	40	0	99	0	115	0	276	0
Pcyt1b	0	26	0	6	22	21	0	22	0
Pdk3	0	68	0	25	10	124	0	121	25
Pdk3	14	0	0	0	0	0	0	0	0
Zfx	0	83	0	43	19	45	0	308	13
Zfx	72	374	0	314	71	417	2	1076	63
Zfx	0	42	0	95	0	42	0	446	0
Zfx	0	0	0	0	0	0	0	68	0
Eif2s3	178	966	0	492	199	603	6	2830	115
Eif2s3	0	0	0	0	0	0	0	5	0
Eif2s3	0	4	0	0	0	0	0	11	0
Klhl15	0	14	0	18	0	0	0	17	0
Klhl15	0	1	0	0	14	29	0	116	13
Klhl15	0	53	0	73	0	0	0	154	0
Apoo	0	99	0	58	0	38	0	781	10
Apoo	0	0	0	100	10	0	0	5	0
Maged1	4	1	0	1	3	1	1	7	2
Maged1	0	0	0	0	0	0	0	0	34
Maged1	314	914	0	644	304	289	4	2891	70
Gspt2	2	22	0	0	7	7	0	49	0
Amer1	28	131	0	119	27	58	0	293	7
Zc4h2	0	57	0	37	22	47	0	133	9
AABR07038957.1	0	0	0	0	0	0	0	2	0
Zc3h12b	0	0	0	5	5	0	0	0	4
Las1l	0	89	0	53	0	42	0	106	0
Las1l	1	4	0	3	1	2	0	2	3
Msn	146	2723	2	2913	619	5503	28	6098	739
Msn	0	1	0	0	0	1	0	1	0
Vsig4	0	0	0	0	0	31	0	5	0
Heph	10	223	0	0	0	262	0	390	0
Heph	0	60	0	137	18	313	0	185	44
Gpr165	0	0	0	0	0	0	0	13	0
Eda2r	18	49	0	97	0	172	0	154	24
Eda2r	0	0	0	0	0	29	0	0	0
Ar	54	346	0	110	95	147	0	647	11
AABR07039094.1	0	0	0	2	0	0	0	0	0
Ophn1	0	174	0	50	0	81	0	1492	46
Ophn1	160	702	0	761	48	115	0	801	0
Ophn1	0	6	0	18	0	8	0	38	0
Yipf6	45	256	0	32	0	224	6	56	17
Yipf6	0	0	0	2	0	0	0	0	0
Yipf6	0	0	0	166	55	0	0	1244	0
Stard8	0	4	0	0	0	1	0	6	0
Stard8	0	354	0	57	0	229	0	514	0
Stard8	0	0	0	137	0	0	0	0	24
Stard8	42	78	0	130	60	134	0	227	0
Stard8	1	0	0	1	0	1	0	3	0
Efnb1	75	722	0	721	25	158	0	1498	44
Pja1	61	542	0	407	183	165	4	1444	33
Pja1	2	102	0	67	28	34	0	244	7
Pja1	0	1	0	23	6	0	0	17	1
Eda	0	34	0	6	11	5	0	0	3
Eda	0	0	0	0	10	0	0	57	0
Awat2	0	0	0	6	0	0	0	159	0
Otud6a	0	0	0	2	0	0	0	43	0
Igbp1	32	306	0	191	52	142	0	830	0
P2ry4	0	8	0	22	0	0	0	28	0
Arr3	0	10	0	11	0	4	0	53	0
Pdzd11	0	63	0	0	32	29	0	181	26
Pdzd11	0	56	0	53	0	67	0	120	0
Pdzd11	0	22	0	25	3	15	0	49	1
Pdzd11	0	11	0	49	0	0	0	27	0
Kif4a	0	37	0	29	6	153	0	128	0
Kif4a	0	0	0	0	0	0	0	0	17
Gdpd2	0	0	0	0	3	0	0	0	0
Dlg3	0	0	0	38	0	17	0	0	0
Snx12	0	5	0	0	0	0	0	0	0
Snx12	0	4	0	0	0	12	0	6	0
Snx12	11	363	0	167	128	269	5	542	18
Foxo4	0	265	0	135	82	57	0	556	0
Foxo4	431	432	0	301	104	60	9	913	22
Il2rg	0	18	0	114	0	14	0	45	5
Il2rg	0	0	0	35	0	127	0	37	57
Il2rg	0	136	0	326	0	305	0	543	0
Med12	404	555	0	970	76	693	0	2741	126
Med12	0	0	0	0	0	0	0	670	0
Med12	14	580	0	845	0	16	0	700	0
Nlgn3	0	0	0	7	0	0	0	0	0
Nlgn3	23	65	0	29	64	5	0	59	0
Nlgn3	0	0	0	0	0	0	0	95	0
Gjb1	0	0	0	0	4	0	0	12	0
Zmym3	0	0	0	0	0	0	0	78	0
Zmym3	0	38	0	2	0	16	0	38	0
Zmym3	0	2	0	5	0	1	0	1	0
Nono	137	1388	0	967	222	1240	8	3890	284
Nono	1	19	0	8	1	13	0	54	5
Itgb1bp2	0	5	0	0	0	6	0	23	0
Ogt	37	0	0	820	0	0	0	149	0
Ogt	181	0	0	228	3	0	0	287	0
Cxcr3	0	6	0	4	0	27	0	12	0
LOC100361265	0	0	0	7	0	0	0	0	0
Pin4	7	151	0	79	23	145	0	466	15
Ercc6l	0	20	0	0	0	71	0	42	4
Rps4x	632	631	0	1946	1440	2148	0	8611	377
Cited1	0	12	0	3	10	0	0	11	0
Cited1	0	6	0	0	0	0	0	0	0
Hdac8	0	80	0	59	6	42	0	195	0
Phka1	28	201	0	168	19	90	0	877	4
Dmrtc1c1	0	0	0	5	0	0	0	0	0
Zfp449	0	45	0	0	0	0	0	18	0
Zfp449	0	0	0	37	29	26	5	155	11
Rlim	0	29	0	27	46	36	0	81	14
Rlim	0	221	0	216	3	106	0	422	43
Rlim	0	1	0	0	0	3	0	0	0
Rlim	0	2	0	1	0	1	0	9	2
Chic1	2	30	0	19	5	9	0	31	0
Chic1	2	20	0	12	5	0	0	6	0
LOC680227	0	0	0	0	0	10	0	0	6
Slc16a2	209	390	3	213	48	127	0	1459	12
NEWGENE_1559832	0	11	0	28	0	10	0	10	2
Nexmif	0	0	0	14	7	0	0	36	0
Abcb7	0	19	0	16	0	19	0	583	0
Abcb7	21	116	0	96	13	84	0	126	7
Uprt	0	72	3	49	26	103	0	259	15
Zdhhc15	0	34	0	49	16	15	0	94	0
Magee2	0	0	0	4	0	0	0	3	0
Pbdc1	0	83	0	38	10	161	0	237	49
Magee1	15	46	0	36	33	9	0	151	4
Atrx	0	0	0	1	0	0	0	1	0
Fgf16	0	17	0	0	2	6	0	91	0
Atrx	0	0	0	2	0	1	0	17	0
Atrx	0	0	0	1	0	0	0	1	0
Magt1	0	1	0	0	0	0	0	1144	0
Magt1	34	448	0	461	87	399	0	1241	97
Cox7b	91	873	0	1841	117	256	6	8666	28
Atp7a	0	284	0	265	199	673	0	813	104
Atp7a	0	3	0	5	0	13	0	8	0
Atp7a	0	0	0	0	0	0	0	183	0
Atp7a	0	1	0	3	1	3	0	3	2
Pgk1	369	1416	0	1142	273	1274	10	9079	202
Taf9b	0	0	0	53	0	19	0	263	0
Taf9b	0	0	0	0	0	0	0	25	7
Taf9b	0	13	0	0	17	0	0	0	0
Taf9b	0	73	0	42	0	33	0	148	9
Cysltr1	0	4	0	8	3	69	0	69	10
Cysltr1	0	24	0	10	0	60	0	42	5
Rtl3	0	11	0	8	0	0	0	6	0
Lpar4	0	34	0	25	4	32	0	136	10
P2ry10	0	5	0	0	0	8	0	24	0
RGD1560455	0	17	0	24	7	180	0	37	28
Gpr174	0	0	0	0	0	15	0	12	0
Itm2a	7	234	0	118	39	85	0	1007	36
RGD1566265	0	50	0	65	20	74	0	214	11
Brwd3	0	89	0	0	24	0	0	44	0
Hmgn5	0	58	0	46	6	62	3	481	26
Sh3bgrl	4	186	0	196	39	66	0	438	31
AABR07039579.1	0	0	0	0	0	0	0	5	0
LOC681325	0	0	0	0	0	180	0	5	50
AABR07039648.1	0	0	0	7	0	0	0	0	0
AABR07039651.1	0	1	0	0	0	2	0	8	0
LOC100910438	22	37	0	43	12	54	0	167	6
Rps6ka6	0	0	0	6	0	0	0	0	0
AABR07039694.1	0	2	0	2	0	1	0	5	2
Hdx	0	34	0	77	4	14	0	89	4
Apool	0	7	0	22	3	0	0	328	12
Satl1	0	7	0	0	0	0	0	24	0
Zfp711	0	17	0	12	0	0	0	10	0
Pof1b	0	0	0	0	0	0	0	0	7
Chm	14	125	0	99	27	178	0	625	41
Chm	0	1	0	0	0	1	0	0	0
Dach2	0	0	0	0	0	0	0	3	0
Klhl4	0	221	0	128	20	48	0	450	0
M6pr	14	369	0	227	92	170	5	1506	79
Pabpc5	0	0	0	0	3	0	0	7	0
AABR07040095.1	0	0	0	0	3	0	0	12	0
LOC100361016	0	0	0	0	0	0	0	9	0
Nap1l3	3	16	0	35	19	3	0	125	2
AABR07040430.1	0	0	0	0	0	6	0	7	0
Pcdh19	121	613	0	621	27	225	0	1484	54
Pcdh19	0	194	0	10	0	18	0	249	0
Tnmd	0	9	0	0	0	0	0	0	0
Tspan6	0	78	0	33	30	56	0	331	25
Srpx2	0	36	0	13	16	140	0	50	33
Sytl4	0	60	0	61	7	26	0	223	0
Cstf2	0	33	0	37	0	2	0	17	0
Cstf2	8	108	0	194	41	74	0	464	25
Cstf2	0	30	0	23	0	17	0	60	0
Nox1	0	0	0	0	0	15	0	11	0
Xkrx	0	5	0	3	0	0	0	26	0
Arl13a	0	0	0	0	0	13	0	26	0
Tmem35a	9	10	0	6	60	15	0	10	0
Cenpi	0	0	0	0	0	0	0	25	0
Cenpi	0	0	0	8	0	74	0	16	0
Drp2	0	307	0	42	438	42	0	922	9
Btk	0	0	0	0	0	0	0	3	3
Btk	0	0	0	0	0	2	0	0	0
Rpl36a	30	1787	0	707	336	562	0	2592	57
Gla	0	48	0	53	19	74	0	188	13
Hnrnph2	0	11	0	2	10	10	0	18	0
Armcx4	14	705	0	459	146	212	3	1204	46
Armcx1	14	111	0	64	28	101	0	339	5
Armcx6	0	43	0	11	9	28	0	61	9
Armcx3	13	368	0	263	106	367	5	1091	98
Armcx3	0	0	0	3	0	0	0	21	0
Armcx2	47	209	0	88	113	66	0	287	25
Zmat1	5	81	0	92	17	47	0	255	9
LOC108348137	14	137	0	78	37	110	0	375	5
Tcp11x2	0	0	0	0	3	0	0	0	0
Armcx5	15	46	0	31	22	47	2	124	7
Gprasp1	46	344	0	274	162	127	0	858	33
Gprasp2	9	70	0	68	55	16	0	258	5
Bhlhb9	6	152	0	80	19	80	4	673	18
Arxes2	11	165	0	137	10	4	0	1421	0
MGC109340	7	138	0	122	6	2	0	637	0
Bex2	5	5	0	0	59	0	0	14	0
AABR07040624.1	0	0	0	0	0	0	0	16	0
Tceal8	0	280	0	166	73	345	0	1142	76
Tceal5	0	5	0	2	8	0	0	1	0
Tceal9	4	347	2	264	150	212	0	1215	40
Bex3	20	99	0	51	41	21	0	122	9
Tceal3	2	3	0	4	6	1	0	5	0
Tceal1	0	50	0	26	10	11	0	117	4
Glra4	0	4	0	6	0	10	0	27	0
Plp1	218	147	0	0	332	0	0	302	0
Rab9b	0	7	0	7	20	0	0	31	0
Tmsb15b2	0	15	0	8	11	0	0	59	0
Fam199x	0	66	0	100	23	44	0	172	0
Il1rapl2	0	0	0	0	0	0	0	2	2
Nrk	0	4	0	0	4	0	0	11	0
Nrk	0	111	0	21	23	13	0	210	12
Nrk	0	0	0	0	0	0	0	34	0
Nrk	0	1	0	0	0	0	0	1	0
Pwwp3b	0	18	0	12	14	0	0	24	0
Radx	0	0	0	4	0	33	0	0	0
Rnf128	12	38	0	12	0	0	0	138	11
Rnf128	0	15	0	9	0	176	3	193	4
Tbc1d8b	12	216	3	190	46	256	0	692	64
Cldn2	17	87	0	32	29	0	0	10	0
Cldn2	0	7	0	5	0	0	0	0	0
Morc4	0	257	0	192	41	71	0	736	40
Morc4	0	0	0	0	28	22	0	0	0
Morc4	0	81	0	57	0	0	0	139	0
Rbm41	4	237	0	167	41	222	0	704	37
Nup62cl	0	0	0	0	0	0	0	6	0
AABR07040839.1	0	0	0	0	0	0	0	5	0
Prps1	7	125	0	62	36	88	0	359	14
Tsc22d3	10	1002	0	703	293	891	0	2287	143
AABR07040840.1	0	0	0	0	0	2	0	5	0
Mid2	19	318	2	222	59	125	4	918	23
Tex13b	0	0	0	0	0	36	0	0	0
Vsig1	0	0	0	3	4	0	0	9	0
AABR07040855.1	9	48	0	38	13	49	0	131	2
Psmd10	0	31	0	30	0	19	0	80	7
AABR07040864.1	0	49	0	92	19	80	0	188	9
Col4a6	104	137	0	61	70	0	0	45	0
Col4a5	561	1270	0	285	568	64	0	566	15
AABR07040892.1	4	6	2	2	0	2	0	0	0
Gucy2f	0	4	0	0	0	0	0	0	0
Nxt2	5	15	0	25	0	71	0	141	4
Kcne5	0	7	0	0	2	10	0	5	2
Acsl4	3	133	0	694	0	375	0	1536	104
Tmem164	100	351	3	228	104	497	2	1145	70
Ammecr1	6	47	0	41	8	66	0	79	10
Rtl9	43	24	0	29	0	0	0	203	0
Chrdl1	25	148	0	32	46	19	0	373	0
Pak3	0	8	0	0	20	0	0	16	0
Pak3	0	0	0	0	4	0	0	0	0
Capn6	0	15	0	18	9	70	0	60	13
Dcx	0	34	0	22	23	11	0	104	0
AABR07040936.1	0	0	0	0	0	0	0	4	0
LOC108349189	7	270	0	199	63	234	3	958	47
LOC100361854	9	83	0	26	15	32	0	131	1
LOC108349244	0	49	0	20	11	54	0	182	11
LOC108349244	0	0	0	0	0	1	0	6	0
LOC108349244	0	33	0	0	0	26	0	228	0
Trpc5	17	0	0	5	6	0	0	29	0
Rtl4	0	3	0	0	6	0	0	0	0
Lhfpl1	0	0	0	0	0	4	0	29	0
Amot	0	106	0	52	30	43	3	209	25
Htr2c	10	0	0	0	0	0	0	0	0
Lrch2	3	67	0	48	8	15	0	95	7
AABR07041089.1	10	35	0	14	30	16	0	44	19
Pls3	22	1231	5	1572	244	744	8	2671	157
LOC103694506	7	44	0	38	14	28	0	170	3
Agtr2	0	4	0	3	0	0	0	0	0
AABR07041109.1	6	33	0	26	9	20	0	103	2
Wdr44	22	76	0	114	19	107	0	231	0
Wdr44	6	106	0	83	7	105	0	327	30
Wdr44	0	4	0	6	7	25	0	112	3
Klhl13	0	317	0	128	91	144	0	574	34
Dock11	29	196	0	136	94	1142	10	767	154
Dock11	0	0	0	0	0	0	0	1	0
Il13ra1	38	141	0	107	18	653	0	765	99
Zcchc12	13	14	0	3	16	3	0	21	6
Lonrf3	23	81	0	12	12	180	0	49	15
Pgrmc1	35	10	0	27	0	0	0	18	0
Pgrmc1	0	306	0	205	112	387	0	1218	66
Akap17b	21	72	0	46	20	131	0	174	37
Slc25a43	0	9	0	7	7	128	0	10	23
Slc25a5	359	2029	3	1836	128	855	0	11717	72
RGD1564541	0	242	0	118	55	159	0	742	27
RGD1564541	0	17	0	66	0	13	0	17	0
RGD1564541	0	9	0	4	1	7	0	19	6
Ube2a	29	127	0	155	24	199	0	785	29
Ube2a	0	0	0	6	0	3	0	1	0
Nkrf	0	31	0	58	0	25	0	147	0
Septin6	13	28	0	42	31	13	4	0	0
Septin6	0	0	0	0	0	264	0	110	49
Sowahd	0	0	0	0	0	8	0	0	0
LOC103693375	109	1202	0	373	0	466	10	2002	47
LOC103693375	2	41	0	22	11	42	0	107	4
Upf3b	9	134	0	149	23	125	0	524	54
Upf3b	0	0	0	0	0	0	0	100	0
Nkap	8	90	0	80	28	67	0	328	19
Nkap	0	0	0	0	0	0	0	5	0
Nkap	0	26	0	11	0	4	0	88	0
Akap14	0	0	0	0	0	0	0	5	0
LOC108348144	5	150	0	194	5	6	0	558	3
LOC108348144	50	0	0	0	43	50	0	0	0
Rnf113a1	0	6	0	10	5	7	0	23	0
Rhox5	0	0	0	8	0	0	0	0	0
Zbtb33	7	97	0	79	13	83	0	304	17
Tmem255a	0	5	0	0	22	4	0	13	0
LOC100910807	10	111	0	94	17	89	0	331	16
Tmem255a	0	1	0	0	22	7	0	9	0
Ndufa1	44	251	0	267	36	47	0	951	4
LOC108348079	0	5	0	9	6	7	0	25	0
RGD1560927	0	0	0	1	0	0	0	0	0
Atp1b4	0	0	0	7	0	7	0	12	0
Lamp2	0	555	0	437	74	1107	0	3325	156
Cul4b	75	413	0	440	77	417	6	1859	91
Mcts1	0	19	0	28	0	23	0	30	0
Mcts1	2	16	0	20	2	16	0	186	0
C1galt1c1	0	72	0	47	9	81	0	381	26
Gria3	0	0	0	0	0	11	0	0	4
Gria3	28	33	0	11	26	91	0	50	18
Thoc2	0	0	0	140	0	115	0	125	0
Xiap	0	685	0	1103	214	99	0	15	0
Xiap	0	21	0	13	0	511	0	39	0
Xiap	0	508	0	0	0	321	0	1076	0
Stag2	75	705	0	592	171	747	0	3095	225
Stag2	0	352	0	134	5	333	0	1088	4
AABR07041403.1	0	2	0	0	0	0	0	0	0
Sh2d1a	0	0	0	0	9	0	0	14	0
Dcaf12l2	0	3	0	0	0	0	0	0	2
Dcaf12l1	0	7	0	0	14	0	0	21	0
Prr32	79	157	0	86	3	0	0	1227	3
LOC103694516	0	2	0	1	0	0	0	1	1
AABR07041600.1	31	40	0	15	12	12	0	46	0
Smarca1	20	30	0	7	18	18	0	110	19
Ocrl	0	126	0	111	40	235	0	607	37
Apln	11	104	0	44	0	8	0	221	7
Xpnpep2	15	24	0	8	0	4	0	110	0
Sash3	42	25	0	25	0	438	0	94	28
Zdhhc9	25	76	0	54	45	115	0	337	31
Utp14a	26	168	0	114	19	177	0	505	48
Bcorl1	137	452	0	341	75	259	9	960	53
Elf4	0	45	0	110	0	314	0	229	0
Aifm1	55	8	0	25	14	9	0	45	19
Aifm1	0	597	0	531	8	152	0	4572	9
Rab33a	0	0	0	6	11	0	0	6	0
Zfp280c	0	35	0	20	0	0	0	204	0
Slc25a14	0	17	0	30	9	19	0	84	4
Gpr119	0	0	0	0	0	0	0	3	0
Rbmx2	0	21	0	25	0	52	0	87	0
Enox2	0	0	0	0	0	0	0	12	0
Enox2	0	71	0	57	13	42	0	173	11
Igsf1	9	0	0	0	0	0	0	0	0
AABR07041724.1	1	5	1	4	1	3	0	63	1
LOC317588	0	1	0	6	0	0	0	6	0
Stk26	0	21	0	8	18	30	0	27	0
Rap2c	49	272	0	125	63	339	0	905	62
Mbnl3	0	16	0	0	0	19	0	26	0
Hs6st2	0	13	0	0	0	14	0	35	0
Usp26	4	0	0	0	0	0	0	0	0
LOC103694517	0	0	0	0	0	1	0	0	0
Gpc4	50	489	0	341	46	18	3	1197	13
AABR07041778.1	23	47	1	22	19	53	1	35	3
Gpc3	42	659	0	294	220	20	0	695	10
AABR07041779.2	0	2	0	2	0	0	0	7	2
Ccdc160	0	7	0	4	3	0	0	3	0
Fgf13	5	14	0	7	12	0	0	9	0
LOC108349258	0	0	0	0	0	0	0	2	0
Mcf2	0	0	0	5	12	0	0	0	0
Atp11c	0	118	0	111	16	157	0	783	21
RGD1560171	0	3	0	0	7	0	0	3	0
RGD1561327	0	0	0	0	3	0	0	0	0
NEWGENE_1565644	0	0	0	0	0	1	0	3	0
Slitrk2	0	7	0	0	18	0	0	108	0
Gabre	1	9	0	5	0	20	0	23	0
Gabre	18	47	0	16	3	23	0	52	0
LOC103690371	0	0	0	2	0	0	0	0	0
Cetn2	11	227	0	110	76	132	0	590	12
Nsdhl	30	216	0	233	61	137	0	2464	24
Zfp185	0	33	0	14	0	0	0	12	0
Pnma3	0	0	0	0	5	0	0	0	0
LOC100360413	1312	7423	6	2774	1848	2612	72	12980	486
Aff2	49	283	0	78	93	162	0	288	10
Aff2	0	29	0	0	17	0	0	70	0
AABR07042361.1	0	2	0	3	0	1	0	7	0
Fmr1	0	0	0	0	0	23	0	633	0
Fmr1	49	340	0	7	60	365	4	509	80
LOC100911991	1379	7740	7	2854	1920	2744	74	13457	512
Olr1768	0	3	0	0	0	0	0	0	0
Ikbkg	0	8	0	93	0	25	0	2	0
G6pd	383	880	0	1412	125	897	0	8610	103
Fam3a	0	25	0	37	19	0	0	89	0
Fam3a	33	205	0	187	0	88	0	629	8
Slc10a3	59	94	0	67	38	106	0	321	12
Ubl4a	55	171	0	142	61	74	0	654	13
Lage3	26	229	0	89	40	95	0	634	8
Plxna3	37	98	0	100	80	87	0	387	11
LOC100910130	11	181	0	124	26	155	4	584	35
Gdi1	108	517	0	349	199	164	0	2126	15
Atp6ap1	141	749	0	544	196	1308	0	2675	145
Taz	59	246	0	214	27	117	0	713	8
Dnase1l1	2	60	0	75	22	75	0	161	22
Dnase1l1	4	33	0	0	1	71	0	129	6
Rpl10	333	4297	2	1543	1115	1849	11	5168	155
Emd	6	141	0	130	41	181	0	305	15
Flna	740	490	0	4610	958	6003	0	2017	0
Mecp2	47	355	0	274	60	227	0	524	31
Irak1	196	898	0	378	110	632	0	3739	0
Hcfc1	656	446	0	915	142	556	0	638	89
Renbp	11	163	0	78	11	262	0	286	35
Naa10	11	0	0	32	0	9	0	53	0
Arhgap4	36	91	0	84	10	327	0	252	57
Avpr2	0	5	0	0	0	8	0	11	0
L1cam	51	43	0	38	0	14	0	454	0
L1cam	0	0	0	0	337	0	0	109	0
Pdzd4	0	9	0	15	14	17	0	50	0
Ssr4	57	263	0	104	38	121	0	516	33
Idh3g	0	0	0	1370	0	0	0	19	0
Srpk3	0	12	0	5	0	5	0	46	0
Plxnb3	19	25	0	25	131	13	0	420	0
Abcd1	99	345	0	237	49	310	0	938	34
Bcap31	0	245	0	549	177	579	0	5755	0
Slc6a8	414	562	0	300	216	190	0	924	35
Pnck	0	0	0	0	0	0	0	5	0
Dusp9	0	0	0	7	0	0	0	0	0
AABR07071935.1	6	15	0	1	4	6	0	21	0
Atp2b3	13	12	0	0	38	0	0	13	0
Bgn	620	7366	0	2731	3197	9432	63	4399	1499
Haus7	0	61	0	57	17	92	3	143	25
Haus7	0	0	0	15	6	37	0	29	0
Zfp92	0	3	0	0	0	0	0	10	0
Zfp275	63	455	0	188	84	171	2	731	42
Mospd1	7	52	0	30	12	38	6	151	0
Fam122b	0	7	0	10	2	9	0	29	0
Fam122b	0	0	0	0	0	0	0	2	0
LOC103689983	0	97	0	88	33	154	0	423	32
RGD1561558	0	0	0	1	0	1	0	1	1
Phf6	0	35	0	44	19	75	0	188	12
LOC100909732	0	19	0	15	3	16	0	39	0
Hprt1	4	159	0	138	48	224	0	481	43
LOC103690175	10	103	0	121	27	216	0	569	34
Ints6l	0	1	0	0	0	0	0	3	0
Ints6l	8	189	0	228	0	64	0	293	12
Mmgt1	42	163	0	107	26	234	0	1947	36
Slc9a6	39	193	0	250	96	121	7	1017	23
Fhl1	3	65	0	0	0	0	0	54	0
Fhl1	0	15	0	62	14	0	0	85	0
Fhl1	0	0	0	0	102	0	0	108	0
Fhl1	15	31	0	41	15	229	0	193	34
Fhl1	0	0	0	0	0	0	0	1	0
Map7d3	0	155	0	94	7	19	0	444	21
Map7d3	0	19	0	5	0	0	0	67	2
Brs3	0	0	0	0	0	0	0	5	0
Htatsf1	33	499	0	407	119	285	0	1163	107
Cd40lg	0	5	0	0	0	0	0	0	0
Arhgef6	0	201	0	197	36	479	0	572	92
Rbmx	0	195	0	119	3	36	0	418	0
Tspy1	0	0	0	0	0	0	0	0	1
Tspy1	0	0	0	0	0	5	0	7	1
Sry	0	2	0	2	0	2	0	22	2
Kdm5d	0	0	0	9	0	0	0	587	0
Eif2s3y	21	252	0	224	40	270	2	1319	54
Ddx3	21	255	0	423	107	305	5	1838	84
Usp9y	0	2	0	0	0	0	0	0	0
Raet1e	0	0	0	0	0	14	0	6	0
Ulbp1	0	69	0	31	13	524	0	215	55
AABR07000147.1	0	0	0	0	0	19	0	53	0
AABR07000156.1	8	6	0	8	5	15	0	45	7
AABR07000159.4	0	0	0	0	0	0	0	2	0
Lrp11	90	206	0	171	152	56	0	682	6
Pcmt1	20	116	0	121	85	73	0	378	0
Nup43	0	50	0	56	0	56	0	214	0
Lats1	173	1050	5	957	158	677	0	2938	111
Katna1	0	102	0	75	8	94	0	337	23
Ginm1	0	86	0	69	54	77	0	428	0
Ppil4	12	188	0	305	22	208	0	744	66
Zc3h12d	35	15	0	19	7	234	0	54	21
Tab2	0	2	0	26	0	40	0	123	35
Tab2	0	3	0	18	9	17	0	25	0
Ust	92	233	0	84	51	120	0	226	17
Sash1	0	38	0	171	97	159	0	63	0
Samd5	20	144	0	121	0	0	0	149	0
Stxbp5	119	674	0	748	115	671	5	1845	104
Stxbp5	0	0	0	0	0	61	0	25	11
Stxbp5	0	0	0	164	0	0	0	73	0
Adgb	0	0	0	8	0	0	0	11	5
Adgb	0	3	0	2	0	3	0	10	0
Rab32	4	137	0	62	35	494	6	254	103
Shprh	25	5	0	0	63	107	7	5	0
Shprh	30	547	0	618	0	234	0	486	53
Fbxo30	21	172	0	145	47	82	4	577	25
Epm2a	4	29	0	22	0	0	0	78	0
Utrn	0	3692	0	301	0	35	0	3621	0
Utrn	9	1545	0	1113	41	75	0	3921	0
Stx11	0	72	0	52	55	61	0	113	17
Sf3b5	54	200	0	136	47	57	0	413	12
Plagl1	21	402	0	147	24	97	0	934	74
Ltv1	0	230	0	150	33	181	0	750	30
Phactr2	99	630	0	585	49	205	9	1059	48
Phactr2	0	14	0	38	0	0	0	48	0
Fuca2	13	17	0	26	15	34	0	141	8
Pex3	16	178	0	188	11	59	0	1015	25
Adat2	0	13	0	11	0	10	0	11	5
Aig1	125	329	0	176	48	111	0	1147	16
Hivep2	391	1256	0	862	170	1197	0	4056	146
Adgrg6	20	104	0	75	142	473	0	577	58
Vta1	50	173	0	167	0	156	0	559	22
Vta1	0	75	0	0	65	83	0	179	0
Nmbr	0	0	0	0	0	0	0	7	0
Mcc	0	0	0	0	0	0	0	9	0
Cited2	121	409	5	153	73	210	0	362	29
Txlnb	0	0	0	0	0	19	0	11	0
Heca	134	841	0	621	189	560	6	1662	66
Abracl	0	132	0	121	83	431	0	287	66
Reps1	0	4	0	0	2	0	0	11	0
Reps1	55	185	0	104	67	250	0	385	27
Ect2l	0	0	0	0	0	6	0	8	0
Ccdc28a	0	69	0	102	0	31	0	220	5
Nhsl1	80	354	0	237	65	243	0	732	37
Hebp2	0	0	0	0	16	0	0	38	0
Arfgef3	25	36	0	29	140	22	0	42	0
RGD1560303	0	0	0	2	0	0	0	0	0
Perp	8	0	0	0	3	0	0	4	4
Tnfaip3	16	187	0	198	24	377	0	290	48
Olig3	0	0	0	3	0	0	0	0	0
Ifngr1	124	810	0	883	85	728	8	2236	102
Il22ra2	0	6	0	17	0	0	0	38	4
Il20ra	0	0	0	2	0	0	0	0	0
Pex7	0	58	0	22	6	38	0	169	0
Map3k5	110	496	0	413	54	284	0	955	50
Map7	0	43	0	35	0	0	0	136	0
Map7	34	144	0	116	29	28	0	184	7
Bclaf1	0	0	0	1	3	0	0	2	0
Bclaf1	7	63	0	48	0	37	0	189	13
Bclaf1	0	1061	0	1771	126	865	0	2953	237
Bclaf1	0	8	0	35	7	26	0	102	5
Pde7b	47	0	0	15	23	51	0	40	15
Pde7b	0	218	0	92	0	0	0	405	0
Ahi1	0	11	0	0	0	0	0	0	0
Myb	0	11	0	11	0	0	0	0	0
Hbs1l	52	104	0	352	45	95	12	280	40
Aldh8a1	14	15	0	0	0	10	0	12	5
Themis	5	0	0	9	0	6	0	16	0
Ptprk	175	896	0	1338	43	88	0	3359	24
LOC103690149	0	0	0	7	7	13	0	6	0
AABR07000581.1	0	0	0	0	0	0	0	19	0
Lama2	0	0	0	6	5	0	0	0	0
Lama2	94	989	0	627	569	1586	12	4922	265
AABR07000583.1	0	2	0	1	6	3	0	40	0
Arhgap18	20	926	0	977	53	850	3	1732	80
AABR07000595.1	0	2	0	0	4	4	0	40	0
Samd3	0	0	0	0	0	0	0	5	0
Tmem200a	8	24	0	33	7	44	0	19	0
RGD1559962	0	4	0	7	2	11	0	10	4
Smlr1	0	0	0	0	0	0	0	3	0
Epb41l2	0	271	0	169	0	194	0	10	2
Epb41l2	0	49	0	0	10	17	0	87	0
Epb41l2	0	33	0	0	115	0	0	0	0
Epb41l2	0	310	0	174	0	86	0	8	0
Epb41l2	0	1	0	0	1	2	0	2	0
Akap7	17	205	0	181	44	290	0	688	28
Arg1	0	8	0	0	3	55	0	47	14
Med23	156	723	0	799	55	350	0	3248	34
Enpp3	0	273	0	257	44	858	0	874	170
Enpp1	31	466	0	276	102	539	7	974	123
Ccn2	0	1851	0	704	1742	112	0	495	0
Ccn2	318	203	0	13	10	41	7	56	10
Moxd1	0	0	0	4	0	0	0	0	0
Stx7	21	34	0	3	0	402	0	173	51
Stx7	0	0	0	0	0	21	0	23	4
LOC108348200	0	2	0	0	0	0	0	2	0
Taar8a	0	0	0	0	0	0	0	1	0
Taar7b	0	0	0	3	0	0	0	0	0
Taar5	0	0	0	9	0	0	0	0	0
Taar4	0	0	0	0	0	0	0	1	0
Vnn1	0	25	0	32	11	52	0	103	0
Vnn3	0	34	0	0	0	0	0	32	0
Slc18b1	38	120	0	69	12	34	0	334	3
Rps12	123	2006	0	709	591	723	9	3289	163
Eya4	0	20	0	7	18	0	0	33	0
LOC100910446	0	177	0	71	51	249	0	268	27
Tcf21	0	26	0	6	4	6	0	5	0
Tbpl1	15	135	0	116	26	136	0	393	20
Slc2a12	53	88	0	46	13	37	0	191	13
Sgk1	78	0	0	133	12	0	11	224	0
Sgk1	0	735	0	1790	67	1472	0	2541	241
Sgk1	0	163	0	820	7	40	0	191	0
Sgk1	0	0	0	4	0	902	6	2	20
AABR07000738.1	0	0	0	2	0	0	0	12	0
LOC501467	0	0	0	2	0	0	0	4	0
Clvs2	0	0	0	0	10	0	0	0	0
Trdn	0	12	0	0	8	0	0	11	0
Trdn	0	0	0	0	0	0	0	8	0
Nkain2	0	0	0	0	3	0	0	8	0
Nkain2	4	0	0	0	0	0	0	6	0
AABR07000902.1	0	0	0	1	0	0	0	0	0
Rnf217	26	122	0	84	30	80	5	300	4
Tpd52l1	0	19	0	0	16	4	0	16	0
Hddc2	0	73	0	32	8	51	0	201	0
Hey2	37	174	0	61	22	41	0	391	13
Hint3	0	63	0	48	8	51	0	294	3
Hint3	0	0	0	0	0	0	0	17	0
Trmt11	0	57	0	77	6	39	0	264	0
Trmt11	0	0	0	0	0	0	0	1	0
Cenpw	0	4	0	0	7	18	0	17	0
Rspo3	0	32	0	0	0	0	0	45	0
Rnf146	0	1	0	0	0	3	0	15	0
Echdc1	0	50	0	30	6	0	4	137	0
Kiaa0408L	0	44	0	21	61	11	0	599	0
Soga3	35	38	0	31	62	4	0	191	0
LOC100910528	0	12	0	0	0	0	0	50	0
LOC100912599	38	196	0	132	22	55	0	795	0
AC094217.1	71	450	0	150	130	176	3	782	46
Lrrc14b	0	16	0	5	8	14	0	80	0
Ccdc127	11	135	0	63	18	111	0	512	16
Sdha	650	3965	0	2907	238	595	18	25519	84
Pdcd6	13	286	0	187	80	407	0	708	68
Ahrr	0	12	0	0	0	0	0	12	0
Exoc3	52	0	0	277	53	209	0	719	33
Exoc3	0	335	0	0	0	44	0	388	0
Slc9a3	21	7	0	7	15	0	0	35	0
Cep72	0	0	0	0	0	20	0	24	0
Tppp	0	12	0	16	2	5	0	47	0
Tppp	6	29	0	11	4	1	0	16	0
Brd9	45	408	0	371	73	168	0	855	44
Trip13	0	0	0	16	0	76	0	46	0
Nkd2	42	185	0	141	59	66	0	411	11
Slc12a7	357	910	0	857	48	627	5	2836	69
Slc12a7	0	1	0	0	0	0	0	1	0
Slc6a19	6	0	0	0	0	0	0	0	0
Tert	34	25	0	14	0	4	0	90	0
Clptm1l	143	292	0	188	88	286	0	1107	67
Lpcat1	16	224	0	157	35	330	4	262	31
Mrpl36	2	2	0	4	1	2	1	7	0
LOC679739	45	198	0	185	24	48	0	974	0
Irx2	0	5	0	3	0	3	0	0	0
Adamts16	0	16	0	14	0	0	0	123	13
Ice1	216	1003	5	1292	134	602	0	2742	92
Med10	43	151	0	83	40	113	6	259	19
Ube2ql1	18	12	0	0	5	6	0	22	0
Nsun2	59	252	0	158	67	268	7	1451	60
Nsun2	0	203	0	128	0	40	0	357	8
Srd5a1	45	48	0	20	36	36	0	281	13
Tent4a	86	347	0	299	82	304	7	909	33
Adcy2	11	18	0	32	27	0	0	95	2
Fastkd3	12	81	0	90	5	76	0	382	7
Mtrr	13	82	0	38	18	65	0	339	7
Mtrr	28	184	0	167	39	128	0	644	9
LOC680200	0	29	0	57	5	70	0	179	3
AABR07001099.2	5	85	0	42	36	67	5	268	18
Zfp874b	0	50	0	37	0	46	0	182	13
LOC102549842	7	10	0	13	0	23	0	78	7
LOC102549842	0	0	0	0	0	0	0	1	0
LOC102547287	0	72	0	54	15	72	0	254	15
LOC102549842	9	80	0	59	23	148	0	312	15
AABR07001100.1	0	9	0	7	3	8	0	15	4
LOC102551340	4	80	0	29	18	161	0	358	23
LOC102551340	0	0	0	46	0	0	0	50	0
LOC501406	0	34	0	9	3	20	0	76	7
Ppp1r14c	0	19	0	8	22	8	0	72	6
Plekhg1	74	27	3	88	35	0	0	55	43
Mthfd1l	0	68	0	43	36	41	0	116	6
Akap12	83	1953	0	305	536	203	7	1752	105
Akap12	0	1691	0	1702	290	0	0	3425	0
Akap12	0	3	0	3	0	0	0	11	0
Zbtb2	25	138	0	193	24	100	0	414	17
Rmnd1	0	19	0	19	7	0	0	1112	0
Armt1	18	95	0	57	18	60	0	495	6
Armt1	0	5	0	5	0	23	0	61	0
Ccdc170	35	184	0	209	5	5	0	406	0
Ccdc170	0	0	0	0	0	0	0	69	0
Esr1	0	0	0	0	0	0	0	8	0
Esr1	38	33	0	98	0	0	0	53	0
Esr1	0	67	0	0	0	0	0	100	0
Esr1	0	0	0	1	0	0	0	4	0
Esr1	0	1	0	0	0	0	0	9	0
Myct1	26	241	0	175	18	19	3	470	6
Fbxo5	0	26	0	26	4	55	0	80	0
Mtrf1l	13	55	0	46	5	56	0	155	0
Rgs17	0	7	0	0	53	0	0	14	0
Rgs17	0	0	0	0	5	0	0	0	0
Oprm1	0	4	0	0	0	1	0	2	0
Oprm1	0	0	0	0	0	1	0	0	0
Ipcef1	10	7	0	11	2	42	0	25	3
Cnksr3	30	195	0	187	42	331	0	318	34
Cnksr3	0	0	0	3	0	4	0	25	0
Scaf8	0	309	0	256	32	182	0	893	8
Scaf8	0	230	0	427	0	68	0	274	0
Tiam2	38	71	0	68	42	517	0	282	60
Tfb1m	0	116	0	69	13	48	0	398	17
Cldn20	0	21	0	4	0	14	0	73	0
Arid1b	0	1	0	0	0	0	0	0	0
Arid1b	0	0	0	0	63	0	0	38	0
Arid1b	0	9	0	0	0	0	0	0	0
Arid1b	4	6	0	1	5	5	4	7	4
Tmem242	34	131	0	120	40	76	0	655	7
Zdhhc14	92	137	0	101	26	303	0	174	37
Snx9	206	1209	0	1032	165	955	0	2970	137
Synj2	0	200	0	0	0	295	0	241	0
Synj2	0	0	0	24	0	0	0	0	0
Synj2	61	0	0	59	39	0	0	20	51
Serac1	0	106	0	98	0	58	0	235	10
Gtf2h5	9	0	0	0	0	0	0	4	17
Tulp4	0	187	0	119	0	0	0	129	0
Tmem181	0	138	0	140	20	147	0	540	45
Dynlt1	0	119	0	60	36	262	0	364	37
Sytl3	0	7	0	6	4	10	0	10	0
Ezr	72	245	0	214	66	726	9	1087	148
Ezr	0	0	0	0	0	1	0	0	0
Rsph3	24	18	0	49	0	0	0	137	0
Tagap	9	32	0	30	21	200	0	152	15
Fndc1	62	219	0	111	78	518	0	638	223
Sod2	42	948	0	752	259	211	0	5751	112
Wtap	0	214	0	181	13	0	0	468	25
Wtap	36	287	0	204	68	311	0	1078	55
Acat2	20	0	0	0	39	0	0	20	0
Acat2l1	17	71	0	87	34	0	0	183	4
Tcp1	50	583	0	554	62	483	2	3076	112
Tcp1	0	0	0	0	0	18	0	0	0
Mrpl18	44	184	0	156	35	73	0	627	12
Pnldc1	0	15	0	0	0	0	0	0	0
Pnldc1	0	0	0	0	0	6	0	0	0
Mas1l	0	12	0	8	4	0	0	14	0
Mas1	0	17	0	12	0	0	0	11	0
Igf2r	0	319	0	223	0	1385	0	194	0
Slc22a1	15	2	0	0	0	7	0	3	0
Slc22a2	6	0	0	7	0	0	0	7	0
AC114389.1	0	0	0	0	0	2	0	3	0
AC114389.1	0	0	0	0	0	0	0	0	5
Slc22a3	200	503	0	387	14	7	0	5078	0
Plg	0	27	0	21	10	0	0	103	0
Plg	0	0	0	0	0	0	0	6	0
AABR07001512.1	0	10	0	0	15	36	0	29	0
Map3k4	0	0	0	0	0	164	0	41	0
Map3k4	29	171	0	0	0	125	0	155	29
Agpat4	0	91	0	107	45	212	0	254	24
Agpat4	0	0	0	0	0	2	0	0	0
AC135026.1	0	14	0	0	0	0	0	15	0
AABR07001519.1	0	29	0	59	0	0	0	129	0
AABR07001519.1	0	0	0	0	0	0	0	3	0
AABR07001519.1	0	0	0	0	0	0	0	1	0
LOC108348175	36	453	0	275	97	82	0	977	25
LOC108348175	9	22	0	5	3	4	0	14	9
Pabpc6	3	5	0	0	0	0	0	0	0
Pde10a	6	29	0	52	17	35	0	157	0
T2	0	0	0	4	7	0	0	11	0
Prr18	2	13	0	4	8	3	0	9	0
Sft2d1	53	154	0	146	17	118	0	776	35
Mpc1	0	392	0	117	100	237	0	1418	1
Ccr6	6	0	0	0	0	12	0	0	0
Fgfr1op	0	91	0	109	16	204	0	351	25
Rnaset2	0	230	0	152	42	562	7	823	137
Rnaset2	0	0	0	0	0	2	0	4	0
Rps6ka2	118	591	0	593	141	381	0	820	43
Tcp10b	0	0	0	1	0	0	0	2	0
RGD1560718	0	2	0	3	0	0	0	0	0
LOC100911027	0	0	0	0	0	0	0	4	0
Smok2a	0	3	0	2	0	0	0	0	0
RGD1561667	7	31	0	38	0	0	0	0	0
Dact2	38	120	0	88	0	20	0	10	5
Dact2	0	147	0	0	33	0	0	244	0
Smoc2	0	0	0	62	46	925	0	264	0
Smoc2	16	148	0	0	0	10	0	85	68
Thbs2	73	235	0	61	142	793	11	1029	752
Wdr27	0	19	0	17	3	3	0	44	0
LOC100125364	8	124	0	95	21	102	0	483	26
Phf10	29	386	4	375	62	395	0	1311	77
Tcte3	0	11	0	17	0	6	0	17	0
Ermard	0	139	0	211	10	152	0	540	11
Dll1	6	411	0	281	7	16	0	681	19
Fam120b	4	19	0	8	0	0	0	0	0
Fam120b	121	129	4	46	54	241	0	197	32
Psmb1	71	797	0	517	211	513	9	2493	68
Tbp	0	122	0	121	17	94	10	346	12
Pdcd2	14	76	0	68	21	89	0	260	0
Prdm9	0	85	0	162	0	12	0	336	8
Chd1	0	635	0	1786	0	582	0	2682	0
Chd1	60	186	0	0	67	15	0	19	146
Rgmb	27	97	0	75	69	62	0	252	0
Riok2	9	130	0	164	0	70	0	500	14
Lix1	13	9	0	0	27	0	0	7	0
Lnpep	0	0	0	13	0	19	0	18	0
Spaca6	22	81	0	88	9	46	0	192	16
Has1	0	17	0	11	0	38	0	27	23
LOC690283	16	15	0	4	2	10	0	35	0
Ppp2r1a	380	1237	0	698	386	429	0	2753	46
LOC100365363	0	107	0	39	32	54	0	164	9
LOC102552527	0	3	0	12	0	0	0	34	0
Zfp54	10	39	0	11	5	17	0	87	8
AABR07001896.1	13	41	0	23	11	63	0	201	9
Zfp52	0	95	0	127	0	78	0	202	17
LOC108348215	0	52	0	90	5	56	0	318	19
Zfp51	0	58	0	81	9	53	0	320	14
AABR07001902.1	10	5	0	7	14	2	4	2	0
AABR07001905.2	0	83	0	52	13	71	0	343	9
AABR07001910.1	0	48	0	32	7	138	0	187	33
AABR07001923.1	0	100	0	87	12	91	0	415	21
LOC102555377	0	47	0	39	0	75	4	201	12
AABR07001926.3	0	33	0	46	9	25	0	195	21
Zfp40	0	59	0	36	11	34	0	215	10
Vom2r16	0	0	0	0	0	2	0	47	0
AABR07001967.1	0	0	0	0	0	0	0	3	0
Zik1	0	6	0	6	3	9	0	47	0
AABR07071874.1	0	0	0	0	1	0	0	0	0
Lilrc2	0	0	0	4	0	32	0	6	13
Lilrb2	0	0	0	0	0	140	0	34	32
Lilrb3a	0	0	0	0	0	158	0	19	17
Lilrb3a	0	22	0	23	4	152	0	94	87
Lilrb3a	6	29	0	30	8	52	4	158	184
Lilrb3a	0	3	0	0	3	15	0	0	0
LOC690948	0	1	0	1	1	3	0	7	11
Rps9	10	42	2	94	0	54	0	125	16
Rps9	265	32	0	1271	31	983	18	2315	96
Tsen34	87	314	0	220	56	62	2	568	6
Mboat7l1	59	118	0	81	35	113	0	543	9
Tmc4	0	3	0	11	0	2	0	15	0
Pirb	6	37	0	46	11	139	0	204	298
Rps9	268	2069	2	1208	586	674	18	3426	97
Tsen34l1	84	328	0	224	48	53	0	505	5
Mboat7	0	0	0	0	0	0	0	43	0
Tmc4	0	3	0	11	0	2	0	18	0
Leng1	14	214	0	119	16	46	0	501	11
Cnot3	130	499	0	662	93	284	3	1373	59
Prpf31	40	267	0	256	46	166	0	790	45
Tfpt	0	96	0	76	16	53	0	199	18
Ndufa3	0	0	0	0	0	0	0	437	0
Oscar	0	0	0	0	0	23	0	18	9
Cacng8	0	9	0	0	0	0	0	0	0
Cacng7	17	27	0	11	23	0	0	13	0
Prkcg	54	34	0	94	0	7	0	72	0
Myadm	0	1371	0	424	297	3407	0	3074	425
Olr386	0	0	0	2	0	0	0	0	0
Nlrp12	0	0	0	0	0	0	0	11	0
LOC103691005	0	52	0	28	5	36	0	146	5
Vom2r80	0	0	0	7	0	0	0	8	0
Mzf1	7	82	0	60	18	44	3	151	4
Ube2m	84	135	0	50	9	30	0	109	3
Chmp2a	0	101	0	22	0	21	0	158	41
Trim28	142	894	0	911	139	494	8	2162	92
Zbtb45	45	122	0	58	18	51	0	210	0
Slc27a5	0	3	0	0	0	0	0	0	0
AABR07002065.2	0	47	0	45	5	14	0	100	0
AABR07002065.1	0	8	0	28	9	3	0	52	0
Zfp324	22	95	0	53	5	45	0	234	4
Rnf225	0	0	0	13	0	0	0	11	0
Rps5	768	2945	5	1108	662	767	0	3219	78
Zscan22	0	44	0	0	0	33	0	45	0
Zfp128	3	126	0	73	18	67	0	369	11
Zfp110	0	28	0	103	0	0	0	21	0
AABR07002068.1	0	3	0	4	0	7	0	24	0
Zfp329	7	115	0	46	25	142	0	338	15
Zscan18	4	15	0	0	5	2	0	7	0
AABR07002093.1	0	7	0	0	0	0	0	15	0
Zfp606	9	48	0	59	6	33	0	271	8
Zfp606	0	0	0	10	0	16	0	9	0
Zfp606	0	0	0	3	0	0	0	3	0
Vom1r53	0	2	0	2	0	0	0	0	0
LOC100909481	13	228	0	109	59	176	0	616	42
LOC100365062	25	234	0	108	58	192	0	646	50
Zfp551	0	0	0	0	7	0	0	0	0
Vom1r47	0	0	0	0	2	0	0	0	0
LOC103690016	15	24	0	8	6	83	0	38	5
LOC100911224	0	6	0	6	3	11	0	50	0
LOC108348118	272	0	0	0	180	0	0	0	0
LOC108348118	0	1651	0	1040	0	1338	0	9849	0
Prrg3	0	9	0	4	0	0	0	13	0
Zfp418	41	122	0	183	17	20	0	590	0
Zfp418	0	2	0	11	0	0	0	68	0
AABR07002247.1	0	0	0	10	0	0	0	47	0
Zfp772	16	17	0	14	0	8	0	156	0
Zfp772	0	15	0	0	0	0	0	37	0
Hiatl3	16	120	0	140	36	162	2	553	34
Hiatl3	0	0	0	3	0	0	0	1	0
LOC108349745	0	9	0	7	0	16	0	56	3
Zfp773-ps1	0	9	0	0	0	0	0	10	0
Zfp954	0	65	0	18	22	22	0	105	12
Aurkc	12	69	0	89	12	16	0	124	0
Usp29	7	30	0	23	15	15	0	168	7
Peg3	0	283	0	796	61	168	0	1351	0
Apeg3	0	0	0	0	0	0	3	0	0
Zim1	18	25	0	9	0	0	0	113	0
Zim1	0	25	0	42	2	6	0	92	6
Olr3	0	0	0	1	0	0	0	0	0
Olr6	0	0	0	2	0	0	0	0	0
Olr7	0	0	0	3	0	0	0	0	0
Olr8	0	3	0	0	0	0	0	0	0
Smim17	0	0	0	0	14	0	0	0	0
Zfp28	0	80	0	75	12	98	0	212	16
Zfp78	0	37	0	30	9	22	3	200	0
Zfp583	0	0	0	13	0	36	0	65	7
Zfp583	0	25	0	8	6	0	0	0	0
Zfp667	12	59	0	56	22	35	0	235	4
Zfp444	58	290	0	153	61	199	0	655	47
Zfp444	6	0	0	23	0	13	0	44	0
Zfp787	0	0	0	0	14	0	0	162	4
Zfp787	99	159	0	104	0	68	0	218	0
Nlrp5	0	0	0	0	0	0	0	5	0
Rasl2-9	0	4	0	0	0	2	0	0	0
Epn1	280	898	0	600	202	366	0	881	49
U2af2	49	969	0	1143	142	497	0	1856	79
Ccdc106	11	21	0	8	0	3	0	54	0
Zfp580	14	37	0	7	20	3	0	28	0
Zfp865	22	47	0	32	13	35	0	170	12
LOC100911196	298	268	0	184	25	102	2	533	13
Zfp524	65	105	0	66	24	29	4	192	3
Fiz1	80	236	0	140	59	92	0	468	9
Zfp579	104	167	0	148	13	20	0	299	0
Sbk3	0	3	0	6	0	0	0	28	0
Sbk2	21	22	0	0	0	0	0	56	0
Ssc5d	25	206	0	61	36	889	4	688	120
Nat14	3	27	0	7	5	10	0	32	0
Zfp628	114	120	0	71	23	36	0	261	12
LOC684270	29	247	0	186	26	30	0	660	3
Isoc2b	79	212	0	144	26	37	0	875	12
Shisa7	26	18	0	20	19	0	0	33	0
Ube2s	51	336	0	275	87	234	0	752	15
Rpl28	52	65	0	352	18	52	0	213	193
Tmem190	0	6	0	0	0	0	0	24	0
Il11	0	5	0	0	0	7	0	0	0
Cox6b2	0	31	0	11	6	20	0	25	0
Kmt5c	0	14	0	6	0	11	0	69	0
Tmem150b	0	8	0	16	0	140	0	22	15
Brsk1	50	76	0	36	78	28	0	82	6
Hspbp1	73	255	0	157	75	144	0	473	16
Ppp6r1	0	0	0	50	0	0	8	228	28
Ppp6r1	523	1024	0	646	244	771	0	2171	0
Tmem86b	0	22	0	14	7	26	0	64	0
Ptprh	0	0	0	0	0	0	0	4	0
Syt5	23	16	0	10	30	48	0	23	4
Dnaaf3	0	0	0	0	0	0	0	7	0
Tnni3	0	0	0	1	0	0	0	0	0
Tnnt1	0	0	0	0	0	0	0	12	0
Ppp1r12c	56	227	0	270	68	65	0	163	0
Eps8l1	0	7	0	7	0	11	0	22	0
Rdh13	27	87	0	75	15	57	0	514	7
Gp6	0	23	0	15	27	13	0	0	0
Ncr1	0	0	0	0	0	0	0	34	3
Fcar	0	0	0	0	0	0	0	2	0
Lilrb4	0	0	0	0	0	1828	0	0	201
Lilrb4	0	0	0	0	0	143	0	53	0
Lilrb3	0	0	0	0	8	114	0	0	2
Lilra5	0	27	0	18	0	357	0	53	53
Lilra5	0	0	0	0	0	66	0	0	0
Cdc42ep5	26	60	0	33	19	18	0	112	3
Leng9	9	95	0	74	13	57	0	183	9
Leng8	635	2734	0	3275	127	1144	28	7643	237
Leng8	146	149	0	490	0	220	0	913	13
Ttyh1	56	50	0	28	152	14	0	426	0
Lair1	0	0	0	4	0	4	0	0	0
Nlrp4b	0	0	0	2	0	0	0	0	0
LOC100912013	0	0	0	2	0	0	0	0	0
RGD1564801	0	6	0	5	0	3	0	20	7
Vom1r59	0	4	0	0	0	0	0	0	0
LOC100911727	13	166	0	181	29	137	0	459	25
Zswim9	33	113	0	71	23	28	0	151	7
Lig1	15	246	0	210	16	194	0	698	33
Pla2g4c	0	0	0	0	0	3	0	1	0
Pla2g4c	0	0	0	0	1	0	0	0	0
Selenow	0	1	0	2	0	1	0	1	1
LOC103690015	169	498	0	322	121	238	2	867	57
Crx	0	4	0	0	0	0	0	0	0
LOC103689961	34	357	0	170	116	175	0	417	22
LOC103689961	0	1	0	2	0	1	0	2	1
Rpl9	99	263	0	88	87	162	4	293	29
Nop53	385	2187	0	1249	328	526	11	2215	64
Ehd2	248	1650	0	1349	46	167	0	4770	6
Bicra	0	430	0	128	0	313	0	126	0
Zfp541	0	2	0	0	0	0	0	0	0
Napa	143	551	0	454	111	287	0	1911	33
Kptn	56	177	0	126	31	95	0	505	6
Slc8a2	92	61	0	15	21	0	0	8	0
Meis3	43	111	0	60	0	104	0	15	0
Meis3	0	0	0	0	23	0	0	180	0
Dhx34	153	174	0	163	33	86	0	450	0
C5ar2	10	30	0	6	12	36	0	62	0
C5ar1	0	49	0	0	0	434	0	116	77
Inafm1	9	3	0	4	4	2	2	7	2
Sae1	45	344	0	246	111	166	0	716	22
Zc3h4	237	1137	0	1156	182	617	0	2478	99
Tmem160	13	104	0	53	10	52	0	159	16
Npas1	0	4	0	0	0	4	0	13	0
Arhgap35	666	1588	0	921	262	557	0	4101	95
Arhgap35	0	32	0	0	49	0	0	164	0
Gng5	0	21	0	12	17	22	0	44	6
LOC108349752	0	0	0	0	0	0	0	7	0
Ap2s1	94	313	0	161	79	231	0	744	32
AC127887.1	8	3	0	5	0	6	0	25	0
Slc1a5	1033	3396	0	1138	41	240	0	16484	49
Slc1a5	0	3	0	2	0	0	0	13	0
Fkrp	61	176	0	69	19	80	0	344	11
Strn4	23	14	0	103	0	0	0	206	0
Strn4	237	240	0	554	108	184	0	308	20
Prkd2	0	89	0	10	0	6	0	0	0
Dact3	594	700	0	204	377	58	0	225	7
Gng8	0	55	0	0	28	13	0	50	6
Gng8	0	0	0	0	0	0	0	4	0
Ptgir	13	52	0	25	0	51	0	74	0
Calm2	0	58	0	0	5	65	0	1487	0
Pnma8b	15	26	0	5	60	14	0	38	3
Pnma8a	0	0	0	6	0	0	0	5	0
Ccdc8	14	158	0	87	100	111	0	174	27
Ppp5c	52	600	0	540	83	257	0	1514	0
Hif3a	0	27	0	7	0	0	0	22	0
Mill1	0	174	0	0	0	0	0	38	0
Micb	0	106	0	85	0	46	0	143	3
Pglyrp1	0	12	0	2	0	2	0	18	0
Ccdc61	25	138	0	174	0	51	0	394	8
Nova2	116	785	0	817	69	37	0	1119	13
Mypop	0	50	0	0	0	0	0	0	0
Mypop	10	0	0	23	38	30	0	69	0
AC110846.1	3	0	0	0	0	0	0	0	0
Irf2bp1	83	311	0	147	63	52	0	569	9
Foxa3	0	8	0	0	0	0	0	3	0
Sympk	369	21	6	3	84	0	8	22	45
Sympk	60	783	0	708	0	395	0	1929	0
Rsph6a	4	4	0	0	0	0	0	9	0
Dmwd	179	290	0	230	65	0	0	343	5
Dmwd	0	4	0	3	0	20	0	89	0
Dmpk	109	528	0	319	196	60	4	385	24
Six5	0	119	0	102	68	7	0	188	0
Fbxo46	27	139	0	88	5	77	0	336	9
Qpctl	0	94	0	43	16	76	0	259	0
Snrpd2	35	358	0	184	125	137	0	483	6
Gipr	28	35	0	97	0	10	0	88	0
Eml2	55	0	0	0	72	0	0	11	5
Eml2	0	333	0	272	3	101	0	572	0
Gpr4	82	264	0	279	11	9	3	364	7
Opa3	33	123	0	117	31	43	0	458	23
Vasp	0	5	0	27	0	32	0	17	0
Vasp	0	4	0	17	0	6	0	15	0
Rtn2	12	14	0	8	30	11	0	17	0
Fosb	47	137	0	119	0	41	4	11	0
Fosb	0	188	0	180	30	36	0	86	77
Ercc1	33	150	3	177	29	48	0	390	7
Cd3eap	0	57	0	42	0	45	0	124	20
Ppp1r13l	37	71	0	200	15	40	0	190	0
Ercc2	70	269	0	344	16	70	0	428	19
Klc3	0	19	0	24	0	2	0	31	0
Ckm	5	32	0	21	8	0	0	13	0
Mark4	189	331	0	325	71	175	0	707	24
Mark4	0	3	0	0	8	0	0	6	0
Exoc3l2	12	42	0	7	0	24	0	68	0
Bloc1s3	23	47	0	33	12	7	0	51	0
Trappc6a	44	155	0	87	12	37	0	277	0
Nkpd1	0	0	0	0	0	0	0	5	4
Ppp1r37	479	879	0	786	130	249	0	1662	22
Gemin7	9	35	0	25	6	26	0	102	0
Zfp296	19	5	0	11	0	6	0	32	0
Clasrp	0	34	0	5	13	55	0	103	5
Clasrp	0	0	0	0	0	0	0	143	0
Relb	0	110	0	0	0	0	0	243	0
Relb	42	0	0	152	26	157	0	0	23
Relb	0	0	0	5	0	0	0	0	0
Relb	0	15	0	10	0	0	0	15	0
Relb	0	0	0	1	0	1	0	0	0
Clptm1	614	769	0	581	135	474	0	2973	42
NEWGENE_2134	0	0	0	0	0	6	0	0	13
NEWGENE_2134	0	0	0	0	0	16	0	0	0
Apoe	0	175	0	4	3	690	0	186	365
Apoe	0	494	0	0	0	1235	0	1041	1268
Apoe	0	5	6	0	0	0	0	29	0
Tomm40	0	10	0	133	0	0	0	407	0
Nectin2	65	177	0	393	14	34	0	711	15
Nectin2	29	211	0	344	11	19	4	420	18
Bcam	293	1327	0	1150	339	17	0	1734	20
Cblc	0	0	0	0	0	0	0	28	0
Cblc	4	0	0	0	0	0	0	0	0
Bcl3	129	160	0	164	12	103	0	325	22
Ceacam16	0	0	0	8	0	0	0	0	0
Pvr	0	296	0	478	30	176	0	642	22
Igsf23	0	0	0	3	0	3	0	0	0
Zfp180	80	502	0	224	284	343	4	937	36
Zfp112	0	23	0	0	0	11	0	16	5
Zfp112	11	40	0	7	6	16	0	126	0
AC118165.1	0	18	0	5	0	7	0	58	0
AC118165.1	10	71	0	38	4	15	0	128	8
AABR07002683.1	0	29	0	30	11	0	0	81	0
Zfp111	14	142	0	135	32	45	0	378	0
Zfp61	0	0	0	3	0	0	0	0	0
Zfp61	14	129	0	43	34	86	0	216	13
Zfp61	8	29	0	20	23	34	0	128	0
LOC102548695	0	86	0	40	33	24	0	172	7
Tescl	0	0	0	0	0	2	0	0	0
Kcnn4	43	28	0	16	0	623	0	25	62
Kcnn4	0	0	0	0	0	13	0	32	4
Smg9	0	2	0	0	0	0	0	8	0
Irgc	3	0	0	0	5	0	0	0	0
Plaur	0	0	0	301	0	210	0	381	0
Plaur	0	176	0	0	14	0	0	0	27
Cadm4	23	106	0	38	200	194	0	767	12
Zfp428	0	22	0	10	13	9	0	8	0
Zfp428	0	18	0	17	0	0	0	95	0
AABR07002689.1	0	0	0	0	2	0	0	8	0
Irgq	0	0	0	37	25	37	0	119	0
Irgq	53	134	0	93	4	0	0	127	3
Pinlyp	0	0	0	0	2	0	0	0	0
Xrcc1	84	769	0	569	104	205	0	1235	35
Zfp575	0	7	0	12	0	8	0	5	0
Ethe1	40	101	0	30	22	66	0	141	14
Phldb3	0	31	0	43	9	46	0	59	10
Lypd3	0	0	0	0	3	7	0	0	0
LOC103689942	0	0	0	0	0	11	0	11	0
LOC100910371	6	1	0	0	0	7	0	0	0
Rps19l2	0	1145	0	503	412	0	0	2750	42
Cd79a	5	10	0	10	8	0	0	12	0
Arhgef1	76	735	0	793	0	44	0	1289	0
Arhgef1	342	331	0	616	155	467	12	1159	132
Arhgef1	0	0	0	72	0	26	0	56	0
Rabac1	90	552	0	264	113	158	0	1168	15
Atp1a3	357	8	0	12	96	1160	12	25	124
Grik5	293	451	0	227	155	29	0	726	0
Zfp574	232	424	0	369	53	71	0	876	5
Pou2f2	11	39	0	25	7	250	0	73	43
Pou2f2	0	0	0	0	0	2	0	1	0
Dedd2	0	15	0	223	22	0	0	73	0
Zfp526	139	353	0	253	47	112	4	641	13
Gsk3a	0	0	0	0	0	40	0	0	7
Gsk3a	73	443	0	276	91	89	0	838	0
Erf	97	324	0	502	57	106	0	560	29
Cic	0	79	0	106	0	0	0	212	0
Pafah1b3	9	23	0	39	0	13	0	85	0
Prr19	0	0	0	0	0	0	0	4	0
Tmem145	0	0	0	0	5	0	0	0	0
Megf8	1101	1870	0	1823	411	934	12	5029	102
Lipe	0	15	0	0	6	0	0	1096	0
AC121639.1	8	321	0	767	0	2	0	995	0
Cxcl17	6	5	0	13	5	6	0	36	0
Ceacam1	0	5	0	0	0	2	0	0	0
Ceacam1	0	232	0	41	13	75	0	298	15
Ceacam1	0	0	0	236	11	0	0	94	23
Erich4	0	0	0	6	0	0	0	4	0
Dmac2	146	299	0	184	82	112	0	864	14
B3gnt8	0	28	0	15	10	7	0	46	0
Bckdha	340	1442	0	823	73	60	0	3864	7
Exosc5	63	237	0	68	13	29	3	309	0
Tmem91	0	11	0	4	3	0	0	12	0
B9d2	24	45	0	37	9	26	0	84	15
Tgfb1	120	585	0	370	127	1455	7	879	120
Ccdc97	0	48	0	45	0	37	0	83	0
Hnrnpul1	0	1003	0	259	0	905	0	815	81
Axl	224	956	0	308	382	1491	35	1703	125
Axl	10	130	0	54	36	216	0	191	9
Axl	0	170	0	69	46	215	0	224	0
Cyp2s1	7	10	0	0	9	35	0	11	7
Ceacam4	0	0	0	0	0	12	0	11	0
Cyp2a1	0	3	0	0	0	0	0	0	0
Cyp2f4	0	8	0	0	0	0	0	0	0
Cyp2t1	32	99	0	69	13	35	0	129	0
Cyp2t1	0	0	0	0	0	0	0	151	0
Egln2	0	24	0	8	113	113	0	310	29
Rab4b	26	148	0	135	42	67	0	295	9
Mia	0	0	0	0	6	0	0	27	2
Snrpa	29	88	0	97	9	58	0	332	0
RGD1560854	15	49	0	39	7	18	0	142	6
RGD1560854	0	0	0	13	0	0	0	0	0
Itpkc	58	215	0	189	41	83	0	519	0
Coq8b	42	158	0	164	36	109	0	405	13
Numbl	0	341	0	67	109	0	0	233	0
Numbl	97	16	0	90	43	152	0	99	14
Ltbp4	348	6	0	0	0	456	0	5	105
Ltbp4	41	2778	0	828	708	0	0	2378	0
Shkbp1	0	105	0	4	0	8	0	22	0
Shkbp1	55	32	0	57	14	69	0	194	9
Sptbn4	64	102	0	115	31	16	0	132	0
Blvrb	79	464	0	377	72	98	0	1708	17
Sertad3	15	67	0	73	20	25	0	130	5
Sertad1	27	176	0	255	48	53	0	278	13
Prx	30	564	0	268	778	62	0	1651	5
Hipk4	22	49	0	64	12	7	0	67	0
Pld3	0	56	0	14	0	120	0	344	0
RGD1307554	84	145	0	64	45	96	0	266	9
RGD1307554	0	0	0	0	5	0	0	0	0
Akt2	0	10	0	0	0	14	9	20	85
Map3k10	144	213	0	125	45	16	0	267	8
LOC100909824	0	5	0	3	1	0	0	3	0
LOC100909824	6	32	0	25	4	0	0	67	0
AABR07071891.1	88	255	0	157	36	55	6	171	25
LOC100910046	4	89	0	59	38	100	0	276	13
AABR07071891.3	0	0	0	0	0	0	0	14	0
AABR07071891.2	0	1	0	6	5	2	0	5	0
AABR07071891.2	0	23	0	8	0	4	0	30	0
AABR07002774.4	0	17	0	24	6	15	0	46	7
AABR07002774.3	0	0	0	0	0	0	0	11	0
AABR07002774.2	9	79	0	57	13	53	0	314	7
AABR07002774.1	0	53	0	49	7	46	0	209	9
AABR07002775.1	0	47	0	22	9	34	0	104	3
AABR07002779.1	7	91	0	42	34	26	0	97	0
Zfp780b-ps1	8	112	0	77	11	58	0	322	9
Zfp780b-ps1	0	2	0	0	1	1	0	2	0
AABR07002784.1	3	10	0	8	0	5	0	38	0
Psmc4	65	481	0	522	103	319	0	1599	45
Fcgbp	0	7	0	16	0	0	0	27	0
Fcgbpl1	0	4	0	8	0	6	0	26	0
Fbl	15	267	0	148	39	225	0	643	37
Dyrk1b	376	80	0	11	95	173	0	41	23
Dyrk1b	10	416	0	171	0	88	0	1144	0
Pak4	48	192	0	106	37	116	0	324	9
Pak4	0	21	0	19	0	0	0	24	0
Lrfn1	24	38	0	0	17	14	0	37	0
Gmfg	0	211	0	125	28	732	0	360	94
Samd4b	421	45	6	262	215	90	10	221	46
Samd4b	0	895	0	232	0	174	0	1432	0
Paf1	54	548	0	838	78	370	0	1425	67
Med29	19	125	0	69	21	37	0	368	16
Zfp36	162	1215	0	719	104	410	0	1472	106
Plekhg2	378	539	0	89	91	369	0	971	73
Plekhg2	0	0	0	1040	0	0	0	0	0
Rps16	1381	7470	7	3056	2160	2482	11	8802	317
Rps16	0	114	0	60	0	0	0	176	0
Supt5h	0	218	0	206	0	89	0	270	0
Supt5h	0	0	0	3	137	482	0	8	0
Supt5h	161	629	0	838	0	0	0	1462	40
Timm50	165	286	0	274	17	93	2	1673	9
Dll3	0	0	0	6	0	0	0	6	0
Eid2b	8	18	0	3	0	8	0	20	0
Eid2	21	25	0	5	4	5	0	36	0
AABR07002848.1	0	7	0	14	0	3	0	24	0
Mrps12	0	17	0	0	21	0	0	0	0
Sars2	54	151	0	104	11	42	0	463	7
Ccer2	0	17	0	26	0	0	0	47	0
Nfkbib	44	141	0	109	20	58	0	831	0
Sirt2	40	210	0	34	64	161	0	336	46
Sirt2	0	50	0	53	0	59	0	465	27
Rinl	0	6	0	15	0	19	0	22	1
Hnrnpl	67	323	0	166	75	280	0	499	43
Hnrnpl	0	431	0	60	159	472	0	475	0
Hnrnpl	0	2	0	3	0	0	0	2	0
Ech1	377	1478	0	1226	128	182	0	3792	0
Lgals4	0	0	0	0	0	0	0	11	0
Lgals7	0	0	0	0	4	0	0	5	0
Capn12	6	75	0	68	0	28	0	65	6
Actn4	709	3165	0	2885	398	1682	18	7538	335
Actn4	0	0	0	5	0	2	0	16	0
Actn4	0	17	0	49	0	0	0	54	0
AABR07002854.1	0	2	0	2	0	0	0	0	0
LOC100909725	8	51	0	13	22	67	0	76	16
LOC100909725	0	1	0	3	0	3	0	6	0
Yif1b	58	91	0	51	19	43	0	326	9
Yif1b	0	5	0	0	0	0	0	6	0
LOC100361913	0	45	0	16	13	24	4	152	6
Spint2	36	26	0	37	37	4	0	75	21
Spint2	0	112	0	8	0	139	0	254	0
Ppp1r14a	37	271	0	118	85	15	0	145	0
Dpf1	0	36	0	0	22	14	0	17	0
Sipa1l3	362	778	0	623	77	543	11	1303	53
AABR07002868.1	8	15	0	9	8	6	0	53	0
Zfp84	0	0	0	0	0	0	0	9	0
Zfp84	29	231	0	189	36	263	0	892	26
Zfp84	0	13	0	34	0	15	0	79	5
Zfp84	15	94	0	98	22	78	0	562	24
AABR07002870.2	0	5	0	4	3	6	0	9	0
AABR07002870.1	11	31	0	27	5	11	0	112	0
LOC103690163	39	143	0	80	32	33	0	329	5
Zfp74	18	62	0	28	10	50	0	167	12
Zfp84	65	181	0	214	24	105	0	623	6
Eif3k	0	0	0	0	0	0	0	247	0
Eif3k	0	15	0	62	0	7	0	69	0
Map4k1	0	52	0	51	11	230	0	104	20
Ryr1	11	25	0	16	0	53	0	0	0
Rasgrp4	0	40	0	28	0	214	0	85	16
Fam98c	44	178	0	263	12	87	0	316	0
Spred3	7	7	0	26	10	39	0	49	5
Spred3	0	16	0	5	0	0	0	0	0
Ggn	0	36	0	32	0	19	0	55	5
Psmd8	165	697	0	430	108	273	0	3413	0
Catsperg	0	16	0	12	0	20	0	57	0
Kcnk6	10	27	0	9	11	19	0	28	4
LOC103689986	42	84	0	38	18	31	0	320	7
LOC103690068	0	36	0	11	13	3	0	13	0
LOC103690114	39	116	0	80	31	33	0	314	5
LOC103690038	18	63	0	29	10	52	0	168	14
Zfp84	65	201	0	229	24	119	0	675	6
Zfp14	23	63	0	36	8	7	0	197	3
Zfp14	0	3	0	0	0	1	0	6	0
AABR07002885.1	0	11	0	9	4	4	0	26	0
Zfp566	0	63	2	57	11	14	0	99	0
Zfp260	7	205	0	134	52	142	1	582	41
Zfp260	11	382	0	206	101	227	0	931	66
AABR07002893.1	0	5	0	4	3	5	0	14	0
Zfp420	5	48	0	22	8	10	0	104	2
AABR07002896.1	9	28	0	27	4	13	0	125	0
Zfp382	0	50	0	0	0	29	0	54	0
Zfp382	0	7	0	0	20	0	0	27	14
Zfp382	0	21	0	31	0	0	0	44	0
LOC687508	0	0	0	6	0	1	0	9	0
LOC100912380	35	433	0	239	78	152	2	1761	22
LOC103690005	0	129	0	83	46	91	0	326	14
LOC103690054	15	85	0	59	11	32	0	381	3
Ovol3	0	3	0	0	0	0	0	12	0
NEWGENE_1306714	0	4	0	3	0	8	0	62	0
NEWGENE_1306714	14	92	0	137	7	73	1	343	11
LOC108348122	62	84	0	45	105	51	0	115	14
Alkbh6	27	56	0	54	10	10	0	147	2
Syne4	0	8	0	13	2	0	0	22	0
LOC108348111	134	238	0	125	25	36	0	792	10
Lrfn3	71	59	0	20	11	7	0	107	6
Tyrobp	7	43	0	26	9	1164	0	128	230
Hcst	0	0	0	0	0	17	0	7	0
Nfkbid	0	16	0	16	0	27	0	26	10
Aplp1	169	109	0	162	102	61	0	154	6
Kirrel2	0	11	0	11	0	0	0	3	0
Nphs1	0	0	0	0	0	23	0	4	0
Prodh2	15	23	0	15	0	0	0	34	0
Arhgap33	28	139	0	185	15	44	6	122	9
Proser3	53	116	0	200	14	79	0	531	9
Hspb6	51	167	0	63	14	37	0	202	8
Lin37	25	134	0	111	7	40	0	359	0
Psenen	85	230	0	159	39	165	0	924	28
U2af1l4	29	167	0	145	50	94	0	542	15
Igflr1	0	6	0	14	0	0	0	17	0
Kmt2b	210	14	0	32	0	63	0	56	0
Zbtb32	0	0	0	0	0	7	0	15	0
Upk1a	0	0	0	11	0	0	0	0	0
Cox6b1	216	14	0	23	0	23	3	142	0
Etv2	0	0	0	3	0	0	0	0	0
Rbm42	175	252	0	224	0	43	0	407	0
Rbm42	72	241	6	137	134	144	0	432	17
Haus5	37	145	0	120	18	77	0	332	7
Atp4a	0	3	0	0	4	2	0	15	0
Tmem147	41	121	0	59	31	53	0	365	0
Gapdhs	0	13	0	8	0	0	0	20	0
Gapdhs	0	0	0	0	0	0	0	4	0
Sbsn	0	33	0	15	0	61	0	81	22
Dmkn	0	0	0	4	10	4	0	1	0
Dmkn	0	0	0	0	8	3	0	6	0
Ffar2	0	12	0	7	0	0	0	20	0
Cd22	29	26	0	15	0	18	0	82	25
Cd22	0	0	0	0	0	0	0	8	0
Mag	34	12	0	0	16	0	0	11	0
Mag	0	0	0	0	0	0	0	89	0
Usf2	406	865	0	455	168	348	9	1606	62
Lsr	23	71	0	40	20	33	0	225	4
Fxyd5	0	58	0	0	0	205	0	11	0
Fxyd5	115	40	0	22	40	68	11	40	16
Fxyd7	12	123	0	76	19	0	0	284	0
Fxyd1	75	429	0	210	90	41	0	1468	0
Lgi4	102	237	0	87	400	75	0	1380	9
Fxyd3	0	6	0	0	0	0	0	0	0
Hpn	0	0	0	0	0	2	0	0	0
Hpn	28	18	0	3	0	0	0	28	0
Scn1b	0	0	0	0	0	0	0	91	0
Scn1b	98	244	2	34	49	50	0	340	8
Scn1b	15	39	0	16	26	11	0	0	0
Gramd1a	0	13	0	178	6	23	0	77	5
RGD1563307	3	3	0	0	3	9	0	9	0
AABR07002945.1	8	72	0	35	18	35	0	86	0
Uba2	0	345	0	361	49	374	0	1048	44
Pdcd2l	18	48	0	62	19	36	0	145	0
Gpi	1835	2339	0	1950	432	1886	17	20279	172
RGD1308428	0	193	0	55	0	79	0	17	0
RGD1308428	0	550	0	159	0	0	0	0	0
RGD1308428	2	58	0	87	5	32	0	158	4
Lsm14a	2	2	0	2	4	40	0	111	0
Lsm14a	8	16	0	7	3	2	0	13	0
Lsm14a	0	47	0	154	38	0	0	294	0
Kctd15	40	241	0	85	88	104	0	145	31
Chst8	4	0	0	0	0	0	0	10	0
AABR07002966.1	0	0	0	0	0	0	0	6	0
LOC108348197	0	94	0	16	19	52	4	552	10
LOC108348128	5	11	0	18	3	2	0	34	2
LOC108348128	0	0	0	0	0	0	0	5	0
LOC108348106	38	39	0	46	10	11	0	88	1
LOC108348106	0	28	0	39	1	1	0	90	0
Clip3	67	201	0	60	218	79	0	189	21
Wdr62	17	83	2	109	6	70	1	339	11
Wdr62	0	2	0	0	0	5	0	20	0
Ovol3	0	5	0	4	0	0	0	11	0
Polr2i	12	69	0	46	11	32	0	369	4
Tbcb	6	129	0	109	52	52	2	337	13
Capns1	61	418	0	453	81	174	5	1985	23
Cox7a1	0	10	0	15	2	4	0	29	1
Pdcd5	10	76	0	9	5	106	0	341	14
Cebpg	58	1002	0	502	134	895	8	4013	105
Cebpa	1876	3600	0	1007	60	841	15	15095	47
Slc7a10	0	20	0	0	0	0	0	447	0
Lrp3	76	122	0	45	39	0	0	566	0
Gpatch1	59	194	0	180	32	135	0	612	22
Snrpg	0	100	0	19	32	79	0	62	13
Rhpn2	0	31	0	12	4	0	0	69	0
Faap24	17	37	0	6	0	13	0	39	0
Cep89	0	22	0	17	25	8	0	19	0
Tdrd12	0	7	0	7	5	0	0	34	0
Nudt19	13	74	0	60	15	35	0	380	6
Rgs9bp	0	7	0	0	0	0	0	10	0
Ankrd27	107	356	0	463	85	205	0	1144	27
NEWGENE_1310561	0	167	0	116	35	152	0	362	22
Dpy19l3	69	243	0	150	41	319	0	482	23
Zfp507	0	0	0	0	5	53	0	23	0
Zfp507	66	297	0	210	24	0	0	735	21
Tshz3	41	139	0	55	55	122	0	330	18
RGD1562402	26	246	0	66	42	157	8	464	29
Zfp536	9	42	0	9	87	9	0	216	0
Uri1	60	324	0	212	35	245	0	942	52
Ccne1	0	10	0	0	0	48	0	54	14
LOC690000	0	153	0	160	0	197	2	1672	0
Plekhf1	73	143	0	120	60	19	0	312	3
Pop4	0	70	0	67	9	133	0	409	38
Uqcrb	21	349	0	610	33	186	5	3610	42
LOC365238	0	0	0	0	0	0	0	4	0
AC120712.3	0	40	0	27	3	12	0	88	4
AABR07003056.1	4	27	0	17	4	8	0	83	5
Vstm2b	0	5	0	0	0	0	0	7	0
AABR07003173.1	0	9	0	7	0	0	0	3	0
AABR07003176.1	0	50	0	46	13	31	0	227	4
Cd33	0	15	0	13	3	202	0	24	26
Iglon5	0	0	0	0	0	5	0	5	0
Vsig10l	74	147	0	83	26	92	0	305	16
Etfb	189	2085	3	1955	60	194	3	8410	11
Cldnd2	0	0	0	0	0	2	0	0	0
Nkg7	0	12	0	0	0	16	0	57	0
Lim2	0	0	0	0	0	0	0	12	0
Siglec10	20	26	0	9	0	132	0	14	14
Siglec10	0	0	0	1	0	0	0	0	0
Siglec5	7	81	0	33	20	38	0	71	11
Zfp17	15	232	0	223	8	242	0	774	30
Vom2r37	0	0	0	2	0	0	0	0	0
LOC102546648	10	59	0	38	15	44	0	126	9
LOC102556967	6	90	0	74	23	69	0	214	10
Zfp819	0	9	0	0	0	0	0	0	0
Zfp819	0	12	0	6	0	18	0	51	0
Ceacam18	0	0	0	9	0	0	0	21	0
AABR07003235.1	0	20	0	7	6	22	0	88	34
Ctu1	0	74	0	27	15	28	0	117	5
AABR07003235.2	2	0	0	3	0	2	0	10	0
Klk9	0	0	0	3	0	0	0	0	0
Klk6	0	3	0	0	0	0	0	0	0
Klk1c6	0	0	0	2	0	0	0	0	0
Klk1c2	0	0	0	4	0	0	0	0	0
Klk1c3	0	8	0	3	0	0	0	3	0
LOC108348116	0	7	0	2	0	0	0	2	0
Klk1	11	0	0	0	0	0	0	4	0
Fv1	38	96	0	61	21	50	0	188	10
Acp4	0	11	0	2	0	0	0	11	0
Clec11a	13	406	0	176	170	314	4	346	86
Shank1	101	13	0	4	20	7	0	18	1
RGD1309036	0	0	0	0	0	0	0	4	0
Syt3	0	0	0	0	1	0	0	0	0
Syt3	14	30	0	0	21	5	0	67	0
Lrrc4b	59	20	0	11	102	10	0	117	0
Aspdh	0	1	0	0	0	0	0	13	0
Josd2	20	83	0	48	38	49	0	229	0
Emc10	66	424	0	258	115	136	0	969	22
Fam71e1	17	16	0	16	0	7	0	55	0
Mybpc2	0	14	0	35	0	0	0	320	0
Spib	0	4	0	0	5	11	0	17	0
Pold1	31	142	0	114	12	81	0	367	9
Nr1h2	632	840	0	616	179	412	0	1522	28
Napsa	35	0	0	12	0	157	0	35	16
Kcnc3	22	0	0	0	10	0	0	0	0
Kcnc3	0	0	0	0	3	0	0	0	0
Myh14	31	260	0	92	270	24	0	22	0
Zfp473	0	6	0	3	0	12	0	55	5
Vrk3	165	352	0	360	34	161	0	896	20
Atf5	18	7	3	265	8	4	0	9	0
Nup62	56	290	0	172	42	186	0	680	22
Il4i1	40	49	0	20	16	64	0	12	4
Il4i1	0	1	0	0	0	3	0	118	0
Tbc1d17	148	554	0	557	78	194	0	1049	16
Akt1s1	205	504	0	303	101	65	0	989	27
Pnkp	14	73	0	102	20	49	0	107	0
Pnkp	0	70	0	59	0	11	0	195	0
Ptov1	402	803	0	461	224	159	5	1388	39
Med25	178	276	0	100	65	54	0	455	0
Fuz	0	29	0	48	11	33	0	137	0
Fuz	47	67	0	7	13	9	0	36	0
Ap2a1	39	2	0	4	13	10	0	4	0
Tsks	3	8	0	0	7	0	0	18	0
Cpt1c	21	38	0	27	22	38	0	131	0
Prmt1	22	281	0	191	45	127	0	713	14
Bcl2l12	34	48	0	39	10	47	0	137	0
Irf3	4	81	0	258	0	19	0	88	0
Scaf1	357	1367	0	1185	225	209	0	2212	0
Rras	132	467	0	362	84	135	0	686	18
Prr12	668	948	0	700	140	318	0	1754	30
Prrg2	19	60	0	48	0	8	0	87	0
Prrg2	0	0	0	2	0	0	0	10	0
Nosip	0	0	0	5	3	3	0	2	0
Nosip	45	4	0	77	0	16	0	13	22
Rcn3	58	66	0	201	210	11	6	76	93
Rcn3	0	552	0	5	0	285	0	772	28
Fcgrt	0	328	0	109	138	10	0	70	0
Rps11	0	3583	0	1357	857	1420	0	6250	0
Rpl13a	353	6492	0	2229	1358	1788	9	8234	250
Flt3lg	36	74	0	42	19	27	0	127	0
Flt3lg	0	26	0	15	3	41	0	33	15
Aldh16a1	166	400	0	266	34	229	0	986	26
Aldh16a1	0	0	0	7	0	0	0	0	0
Pih1d1	49	42	0	53	0	36	0	70	0
Slc17a7	122	0	0	0	0	0	0	0	0
Ccdc155	0	15	0	22	0	0	0	29	0
Tead2	0	0	0	0	0	11	0	0	0
Tead2	0	43	0	36	0	0	0	82	6
Cd37	36	53	0	33	16	245	0	76	15
Trpm4	206	292	0	360	17	87	0	756	23
Hrc	0	45	0	7	11	0	3	28	0
Ppfia3	0	12	0	5	34	0	0	17	0
Lin7b	3	11	0	0	9	0	0	7	0
Snrnp70	0	666	0	244	0	199	0	748	182
Snrnp70	0	3	0	3	0	0	0	3	0
Kcna7	0	0	0	0	0	0	0	3	0
Ntf4	0	3	0	7	0	0	0	0	0
Lhb	0	10	0	0	0	9	0	26	0
Ruvbl2	41	235	0	286	35	96	0	529	0
Gys1	311	664	0	517	28	218	0	3177	35
LOC100360087	2235	2887	1	1138	758	7531	53	4602	355
Bax	0	152	0	59	0	89	0	236	0
Bax	0	58	0	150	33	71	0	62	23
Dhdh	0	55	0	32	5	15	0	116	0
Tulp2	0	13	0	0	0	16	0	25	0
Nucb1	227	1840	0	1156	478	1345	5	5550	232
Tulp2	0	0	0	10	0	0	0	12	0
Ppp1r15a	7	546	0	508	84	164	0	637	51
Ppp1r15a	34	84	0	29	14	62	0	196	7
Plekha4	178	794	0	236	636	106	4	954	17
Hsd17b14	0	4	0	0	5	0	0	17	0
Bcat2	0	842	0	184	0	0	0	716	0
Fgf21	0	11	0	20	0	0	0	13	0
Fut1	0	29	0	57	0	0	0	78	0
Izumo1	0	10	0	24	0	3	0	37	0
Rasip1	0	29	0	44	0	0	0	167	0
Mamstr	29	16	0	29	8	0	0	14	0
Mamstr	0	6	0	0	0	0	0	2	0
Fut2	0	9	0	0	0	0	0	0	0
Sec1	0	0	0	0	0	0	0	1	0
Ntn5	0	0	0	0	0	0	0	4	0
Ca11	30	59	0	25	29	17	0	224	0
Dbp	57	129	0	46	45	85	0	641	7
Dbp	0	54	0	30	0	0	0	50	0
Sphk2	161	402	0	233	69	157	0	837	26
Rpl18	742	57	0	37	25	13	10	96	19
Fam83e	9	0	0	0	0	0	0	34	0
Spaca4	0	0	0	0	3	0	0	15	0
Sult2b1	0	9	0	0	0	0	0	66	0
AC095693.1	7	0	0	0	6	0	0	5	0
Cyth2	60	47	0	24	61	0	2	65	35
Kcnj14	0	17	0	50	0	17	0	117	8
Grwd1	54	161	0	120	17	71	0	273	8
Grin2d	27	89	0	31	20	21	0	92	0
Kdelr1	182	529	0	259	150	304	5	1531	34
Syngr4	0	0	0	4	0	0	0	17	0
Tmem143	0	28	0	2	0	0	0	11	0
Tmem143	138	201	0	88	8	17	0	168	0
Emp3	12	171	0	69	78	896	0	278	79
Ccdc114	0	12	0	0	0	0	0	0	0
Abcc6	0	7	0	2	0	0	0	7	0
Nomo1	356	1101	0	766	221	415	0	2467	63
Kcnj11	82	44	0	31	14	0	3	288	0
Abcc8	0	46	0	82	0	0	0	455	0
Otog	0	0	0	5	0	0	0	6	0
Kcnc1	0	0	0	3	0	0	0	0	0
Sergef	41	90	0	67	28	71	0	96	9
Tph1	0	8	0	6	0	0	0	35	0
LOC691143	0	92	0	54	25	98	0	316	13
LOC691143	0	0	0	0	6	3	0	36	5
Hps5	0	0	0	0	4	0	0	0	0
Hps5	0	0	0	0	0	0	0	549	0
Hps5	32	122	0	230	27	429	0	108	57
Gtf2h1	0	20	0	36	0	205	0	421	0
Ldha	1463	2825	0	2720	380	2207	26	17849	209
Ldhc	0	9	0	10	0	0	0	0	0
Ldhc	0	0	0	0	0	0	0	0	1
AC099150.1	0	0	0	0	0	7	0	21	0
Tsg101	25	399	0	370	67	548	8	1525	97
Uevld	16	88	0	59	15	142	0	320	22
Spty2d1	83	323	0	111	54	98	0	284	48
AABR07003273.1	0	2	0	0	0	0	0	4	0
Tmem86a	28	42	0	23	0	108	0	162	7
Ptpn5	11	0	0	1	0	0	0	5	0
Mrgprx3	0	0	0	0	0	13	0	4	14
AABR07003291.1	0	0	0	0	0	3	0	0	0
Mrgprx2	0	0	0	0	0	189	0	10	15
Mrgprx2l	0	0	0	0	0	0	0	3	0
Mrgprb3	0	3	0	9	0	0	0	16	0
Zdhhc13	0	24	0	15	5	86	0	204	11
Zdhhc13	0	0	0	11	0	11	0	13	6
Csrp3	0	3	0	0	0	0	0	0	0
E2f8	0	0	0	7	0	58	0	51	0
Nav2	729	382	0	0	121	52	0	645	0
Nav2	0	0	0	174	0	0	0	102	0
Htatip2	0	19	0	18	18	97	0	139	0
Prmt3	16	62	0	0	0	56	0	215	0
Prmt3	0	0	0	68	8	0	0	11	6
Slc6a5	0	8	0	5	0	0	0	0	0
Nell1	0	19	0	0	52	0	0	16	0
Slc17a6	4	0	0	0	0	0	0	0	0
Fancf	8	27	0	17	7	4	0	51	0
Gas2	0	41	0	31	17	0	0	39	0
Svip	0	58	0	22	28	7	0	163	0
Luzp2	0	0	0	0	2	0	0	0	0
Gabrg3	0	0	0	0	6	0	0	0	0
Gabra5	6	0	0	0	2	0	0	0	0
Gabra5	0	0	0	1	0	0	0	0	0
Gabrb3	0	0	0	4	0	0	0	0	0
Gabrb3	17	2	0	0	25	0	0	9	0
Siglech	0	0	0	0	0	0	0	15	0
Tubgcp5	34	230	0	207	26	165	0	963	34
Cyfip1	72	70	0	19	130	40	12	134	218
Cyfip1	155	1004	0	863	10	1393	0	3720	0
Nipa2	20	142	0	123	50	257	9	763	33
Nipa1	13	83	0	32	71	99	0	264	9
Herc2	559	2082	0	2405	320	1729	16	7898	238
Herc2	0	0	0	0	0	39	0	3	0
Oca2	2	0	0	2	3	5	0	7	0
Atp10a	46	108	0	50	30	314	0	384	65
LOC100912195	0	0	0	0	16	0	0	3	0
Ube3a	214	296	0	202	86	363	0	1575	158
Ube3a	0	7	0	0	0	9	0	55	7
AABR07003610.1	0	0	0	0	0	0	0	3	0
AABR07003833.1	0	0	0	0	0	0	0	2	0
Ndn	14	54	0	122	62	34	2	201	8
Magel2	4	0	0	17	0	0	0	15	0
Mkrn3	0	13	0	5	9	0	0	24	3
Peg12	5	16	0	6	4	3	0	29	6
Chrna7	3	0	0	0	89	0	0	10	0
Hmgn5b	0	101	0	64	14	102	3	701	36
Otud7a	0	0	0	0	7	0	0	12	0
Klf13	0	8	0	8	0	10	0	24	3
Trpm1	0	0	0	2	1	0	0	0	0
Mtmr10	39	350	0	232	47	447	0	946	20
Fan1	20	117	0	104	18	63	0	336	14
Mphosph10	4	186	0	200	12	186	3	705	47
Mcee	11	320	0	182	23	50	0	1655	8
Apba2	29	18	0	0	34	10	0	47	0
Fam189a1	0	9	0	0	0	0	0	0	0
Tjp1	42	299	0	201	19	5	0	22	11
Tjp1	0	1088	0	526	0	0	0	3746	0
Tars3	0	0	0	0	0	0	0	11	0
Tm2d3	0	0	0	0	0	5	0	32	0
Pcsk6	85	8	0	117	84	105	0	453	12
Snrpa1	0	111	0	121	20	86	0	503	0
Snrpa1	0	1	0	0	1	0	0	15	5
Selenos	43	7	0	7	0	110	0	284	52
Selenos	0	189	0	91	54	123	0	332	0
Chsy1	30	311	0	143	77	457	6	762	86
Lrrk1	0	163	0	458	0	249	0	1456	0
Aldh1a3	54	1431	0	272	157	224	0	927	18
Asb7	8	49	0	36	22	71	0	231	7
Asb7	26	68	0	107	13	45	0	192	4
Lins1	0	18	0	0	6	13	0	94	0
Adamts17	0	61	0	50	65	0	0	187	0
Lysmd4	0	54	0	23	20	19	0	166	0
Mef2a	0	184	0	175	0	96	0	619	7
Mef2a	0	16	0	41	0	26	0	27	0
Mef2a	0	1	0	1	0	1	0	2	0
Lrrc28	27	72	0	69	20	45	0	271	5
Ttc23	0	24	0	0	0	0	0	45	0
Ttc23	0	0	0	0	0	0	0	16	0
Ttc23	0	5	0	4	0	0	0	2	0
Synm	193	1291	0	339	365	178	0	1216	5
Synm	0	902	0	574	121	273	5	871	28
Synm	0	1	0	0	0	0	0	0	0
Synm	22	13	0	24	1	13	1	12	7
Igf1r	0	9	0	10	0	13	0	1	0
Pgpep1l	0	0	0	5	0	0	0	0	0
Fam169b	0	30	0	25	0	0	0	32	0
Arrdc4	20	275	0	377	47	264	0	1108	104
Arrdc4	0	2	0	3	0	4	0	5	0
Nr2f2	0	100	0	65	29	103	0	332	73
Nr2f2	115	446	0	144	125	120	0	727	25
AABR07004232.1	1	1	0	2	0	3	0	11	5
Mctp2	0	16	0	0	11	43	0	127	10
Rgma	293	164	0	0	0	5	0	125	0
Chd2	284	1501	0	1139	203	419	0	2018	226
Chd2	0	28	0	29	0	46	0	277	0
Chd2	0	0	0	27	0	25	0	23	0
Fam174b	0	0	0	0	1	1	0	0	0
Fam174b	0	37	0	7	35	5	0	32	0
Slco3a1	75	137	0	27	72	95	0	230	0
Slco3a1	0	0	0	0	0	11	0	23	0
Slco3a1	0	3	0	0	45	14	0	8	0
Akap13	0	30	0	74	26	33	0	72	0
Klhl25	34	113	0	156	22	43	3	392	18
Agbl1	0	2	0	5	0	0	0	4	0
Ntrk3	187	724	0	609	49	0	0	526	0
Ntrk3	0	0	0	234	0	0	0	53	0
Ntrk3	0	7	0	0	0	0	0	0	0
Ntrk3	1	326	0	1155	16	0	0	133	0
Mrpl46	0	108	0	140	15	68	0	533	12
Mrps11	0	175	0	58	12	24	0	366	0
Det1	17	67	0	40	8	41	0	189	0
Aen	19	89	0	248	18	81	0	413	14
Isg20	0	0	0	0	22	0	0	0	0
Isg20	0	50	0	184	0	23	0	119	0
Acan	17	0	0	0	3	288	0	10	73
Acan	0	0	0	0	0	215	0	0	0
Hapln3	0	11	0	7	4	0	0	0	4
Mfge8	0	0	0	0	0	0	0	27	0
Mfge8	0	1438	0	691	547	258	0	1958	0
Mfge8	204	477	0	27	10	3	0	0	68
Abhd2	22	167	0	99	59	417	0	429	42
Abhd2	0	0	0	51	0	0	0	0	0
Fanci	0	31	0	27	3	77	0	160	27
Polg	0	80	0	115	0	31	0	48	2
LOC691427	32	158	0	96	26	87	0	428	4
Ticrr	14	7	0	9	0	103	0	96	7
Kif7	70	233	0	216	60	79	0	323	40
AC096024.1	1	0	0	1	0	1	0	0	0
Plin1	8074	26857	23	10631	70	60	30	64568	49
Plin1	277	742	0	4831	0	17	0	3062	0
Pex11a	0	191	0	109	0	0	0	344	0
Wdr93	0	11	0	4	0	0	0	87	0
AC096024.2	0	0	0	0	0	0	0	3	2
Mesp1	0	0	0	0	0	0	0	2	0
Anpep	94	0	0	144	49	3719	20	84	498
Anpep	0	96	0	0	0	120	0	893	69
Ap3s2	121	143	0	80	32	73	0	378	8
Arpin	27	296	0	155	58	238	0	718	23
[truncated: 19,787 more rows]
